# Supplementary material for: Risk comparison of adverse reactions among gemcitabine monotherapy, gemcitabine combined with cisplatin, gemcitabine combined with PD-1/PD-L1 inhibitors treatment: insights from the FDA adverse event reporting system database
Source: Research Square preprint supplement (doi:10.21203/rs.3.rs-7907815/v1), 2025-10-22
Supplement: Supplementary file 1 [file ccf7e691bf3345e37794cbbb.xlsx]

## Sheet: Gemcitabine
soc_name_en	a	ROR(95%Cl)	PRR(Chi-square)	EBGM(EBGM05)	IC(IC025)
METABOLISM AND NUTRITION DISORDERS	1820	1.42 ( 1.36 - 1.49 )	1.41 ( 218.68 )	1.41 ( 1.35 )	0.49 ( 0.42 )
BLOOD AND LYMPHATIC SYSTEM DISORDERS	7488	8.23 ( 8.04 - 8.44 )	7.33 ( 41306.91 )	7.28 ( 7.13 )	2.86 ( 2.83 )
RESPIRATORY, THORACIC AND MEDIASTINAL DISORDERS	4839	1.74 ( 1.69 - 1.79 )	1.68 ( 1404.8 )	1.68 ( 1.64 )	0.75 ( 0.71 )
VASCULAR DISORDERS	2229	1.75 ( 1.67 - 1.82 )	1.72 ( 681.28 )	1.72 ( 1.66 )	0.78 ( 0.72 )
GENERAL DISORDERS AND ADMINISTRATION SITE CONDITIONS	8922	0.82 ( 0.81 - 0.84 )	0.85 ( 287.18 )	0.85 ( 0.83 )	-0.23 ( -0.27 )
INFECTIONS AND INFESTATIONS	3713	1.18 ( 1.14 - 1.22 )	1.17 ( 92.57 )	1.17 ( 1.13 )	0.22 ( 0.17 )
SKIN AND SUBCUTANEOUS TISSUE DISORDERS	2394	0.73 ( 0.7 - 0.76 )	0.74 ( 238.24 )	0.74 ( 0.71 )	-0.44 ( -0.5 )
RENAL AND URINARY DISORDERS	1673	1.53 ( 1.45 - 1.6 )	1.51 ( 294.34 )	1.51 ( 1.45 )	0.59 ( 0.52 )
GASTROINTESTINAL DISORDERS	5748	1.13 ( 1.1 - 1.16 )	1.12 ( 76.16 )	1.12 ( 1.09 )	0.16 ( 0.12 )
CARDIAC DISORDERS	2022	1.28 ( 1.23 - 1.34 )	1.27 ( 119.98 )	1.27 ( 1.22 )	0.35 ( 0.28 )
NEOPLASMS BENIGN, MALIGNANT AND UNSPECIFIED (INCL CYSTS AND POLYPS)	3623	2.36 ( 2.29 - 2.45 )	2.28 ( 2673.07 )	2.28 ( 2.22 )	1.19 ( 1.14 )
MUSCULOSKELETAL AND CONNECTIVE TISSUE DISORDERS	1075	0.33 ( 0.31 - 0.35 )	0.34 ( 1473.68 )	0.34 ( 0.32 )	-1.56 ( -1.65 )
HEPATOBILIARY DISORDERS	1591	2.94 ( 2.8 - 3.09 )	2.89 ( 1980.68 )	2.89 ( 2.77 )	1.53 ( 1.46 )
PSYCHIATRIC DISORDERS	561	0.16 ( 0.14 - 0.17 )	0.16 ( 2539.06 )	0.16 ( 0.15 )	-2.61 ( -2.73 )
INVESTIGATIONS	4993	1.37 ( 1.33 - 1.41 )	1.34 ( 456.37 )	1.34 ( 1.31 )	0.42 ( 0.38 )
INJURY, POISONING AND PROCEDURAL COMPLICATIONS	2619	0.44 ( 0.42 - 0.45 )	0.46 ( 1832.66 )	0.46 ( 0.45 )	-1.12 ( -1.18 )
NERVOUS SYSTEM DISORDERS	2971	0.56 ( 0.54 - 0.58 )	0.58 ( 971.53 )	0.58 ( 0.57 )	-0.78 ( -0.83 )
IMMUNE SYSTEM DISORDERS	263	0.39 ( 0.34 - 0.44 )	0.39 ( 251.55 )	0.39 ( 0.35 )	-1.35 ( -1.53 )
EYE DISORDERS	485	0.4 ( 0.36 - 0.43 )	0.4 ( 444.15 )	0.4 ( 0.37 )	-1.32 ( -1.45 )
PRODUCT ISSUES	40	0.04 ( 0.03 - 0.06 )	0.04 ( 890.19 )	0.04 ( 0.03 )	-4.57 ( -5.03 )
SURGICAL AND MEDICAL PROCEDURES	258	0.31 ( 0.28 - 0.35 )	0.31 ( 390.49 )	0.31 ( 0.28 )	-1.67 ( -1.85 )
EAR AND LABYRINTH DISORDERS	146	0.56 ( 0.48 - 0.66 )	0.56 ( 49.82 )	0.56 ( 0.49 )	-0.83 ( -1.07 )
CONGENITAL, FAMILIAL AND GENETIC DISORDERS	53	0.29 ( 0.22 - 0.38 )	0.29 ( 93.28 )	0.29 ( 0.23 )	-1.79 ( -2.19 )
REPRODUCTIVE SYSTEM AND BREAST DISORDERS	129	0.26 ( 0.22 - 0.31 )	0.26 ( 271.75 )	0.26 ( 0.23 )	-1.94 ( -2.19 )
PREGNANCY, PUERPERIUM AND PERINATAL CONDITIONS	19	0.07 ( 0.05 - 0.11 )	0.07 ( 222.55 )	0.07 ( 0.05 )	-3.76 ( -4.41 )
ENDOCRINE DISORDERS	90	0.58 ( 0.48 - 0.72 )	0.58 ( 26.55 )	0.59 ( 0.49 )	-0.77 ( -1.08 )
SOCIAL CIRCUMSTANCES	42	0.16 ( 0.12 - 0.22 )	0.16 ( 185.97 )	0.16 ( 0.12 )	-2.64 ( -3.08 )

## Sheet: Gemcitabine + Cisplatin
soc_name_en	a	ROR(95%Cl)	PRR(Chi-square)	EBGM(EBGM05)	IC(IC025)
METABOLISM AND NUTRITION DISORDERS	348	1.62 ( 1.45 - 1.8 )	1.6 ( 79.04 )	1.6 ( 1.46 )	0.67 ( 0.52 )
BLOOD AND LYMPHATIC SYSTEM DISORDERS	1454	9.64 ( 9.12 - 10.19 )	8.4 ( 9623.32 )	8.38 ( 8 )	3.07 ( 2.99 )
RESPIRATORY, THORACIC AND MEDIASTINAL DISORDERS	646	1.35 ( 1.25 - 1.47 )	1.33 ( 56.03 )	1.33 ( 1.25 )	0.41 ( 0.3 )
VASCULAR DISORDERS	510	2.4 ( 2.2 - 2.62 )	2.33 ( 395.48 )	2.33 ( 2.16 )	1.22 ( 1.09 )
GENERAL DISORDERS AND ADMINISTRATION SITE CONDITIONS	1538	0.85 ( 0.8 - 0.89 )	0.87 ( 36.74 )	0.87 ( 0.83 )	-0.2 ( -0.28 )
INFECTIONS AND INFESTATIONS	662	1.25 ( 1.15 - 1.35 )	1.23 ( 30.81 )	1.23 ( 1.15 )	0.3 ( 0.19 )
INVESTIGATIONS	649	1.03 ( 0.96 - 1.12 )	1.03 ( 0.69 )	1.03 ( 0.97 )	0.05 ( -0.07 )
INJURY, POISONING AND PROCEDURAL COMPLICATIONS	488	0.48 ( 0.44 - 0.53 )	0.51 ( 255.62 )	0.51 ( 0.47 )	-0.97 ( -1.11 )
NEOPLASMS BENIGN, MALIGNANT AND UNSPECIFIED (INCL CYSTS AND POLYPS)	628	2.43 ( 2.24 - 2.64 )	2.34 ( 496.77 )	2.34 ( 2.19 )	1.23 ( 1.11 )
NERVOUS SYSTEM DISORDERS	490	0.55 ( 0.5 - 0.6 )	0.57 ( 173.61 )	0.57 ( 0.53 )	-0.81 ( -0.94 )
IMMUNE SYSTEM DISORDERS	47	0.41 ( 0.31 - 0.55 )	0.42 ( 39.14 )	0.42 ( 0.33 )	-1.27 ( -1.69 )
MUSCULOSKELETAL AND CONNECTIVE TISSUE DISORDERS	123	0.22 ( 0.18 - 0.26 )	0.23 ( 336.26 )	0.23 ( 0.2 )	-2.12 ( -2.38 )
GASTROINTESTINAL DISORDERS	978	1.14 ( 1.07 - 1.22 )	1.13 ( 15.25 )	1.13 ( 1.07 )	0.17 ( 0.08 )
RENAL AND URINARY DISORDERS	382	2.09 ( 1.88 - 2.31 )	2.05 ( 208.17 )	2.05 ( 1.88 )	1.03 ( 0.88 )
EYE DISORDERS	66	0.32 ( 0.25 - 0.41 )	0.32 ( 95.31 )	0.32 ( 0.26 )	-1.63 ( -1.98 )
SURGICAL AND MEDICAL PROCEDURES	27	0.19 ( 0.13 - 0.28 )	0.2 ( 90.67 )	0.2 ( 0.14 )	-2.36 ( -2.9 )
PREGNANCY, PUERPERIUM AND PERINATAL CONDITIONS	10	0.23 ( 0.12 - 0.43 )	0.23 ( 25.9 )	0.23 ( 0.14 )	-2.12 ( -2.99 )
CARDIAC DISORDERS	329	1.23 ( 1.11 - 1.38 )	1.23 ( 14.16 )	1.23 ( 1.12 )	0.29 ( 0.13 )
REPRODUCTIVE SYSTEM AND BREAST DISORDERS	38	0.45 ( 0.33 - 0.63 )	0.46 ( 24.75 )	0.46 ( 0.35 )	-1.13 ( -1.59 )
SKIN AND SUBCUTANEOUS TISSUE DISORDERS	297	0.53 ( 0.47 - 0.59 )	0.54 ( 121.35 )	0.54 ( 0.49 )	-0.88 ( -1.05 )
PSYCHIATRIC DISORDERS	88	0.15 ( 0.12 - 0.18 )	0.15 ( 439.32 )	0.15 ( 0.13 )	-2.71 ( -3.02 )
HEPATOBILIARY DISORDERS	174	1.89 ( 1.62 - 2.19 )	1.87 ( 71.37 )	1.87 ( 1.65 )	0.9 ( 0.68 )
CONGENITAL, FAMILIAL AND GENETIC DISORDERS	12	0.39 ( 0.22 - 0.68 )	0.39 ( 11.64 )	0.39 ( 0.24 )	-1.37 ( -2.17 )
EAR AND LABYRINTH DISORDERS	72	1.65 ( 1.31 - 2.08 )	1.65 ( 18.38 )	1.65 ( 1.36 )	0.72 ( 0.38 )
PRODUCT ISSUES	2	0.01 ( 0 - 0.05 )	0.01 ( 159.29 )	0.01 ( 0 )	-6.33 ( -7.99 )
ENDOCRINE DISORDERS	20	0.77 ( 0.5 - 1.2 )	0.77 ( 1.36 )	0.77 ( 0.53 )	-0.37 ( -1 )
SOCIAL CIRCUMSTANCES	3	0.07 ( 0.02 - 0.21 )	0.07 ( 38.58 )	0.07 ( 0.03 )	-3.88 ( -5.32 )

## Sheet: Gemcitabine + Pembrolizumab
soc_name_en	a	ROR(95%Cl)	PRR(Chi-square)	EBGM(EBGM05)	IC(IC025)
RESPIRATORY, THORACIC AND MEDIASTINAL DISORDERS	43	1.28 ( 0.94 - 1.74 )	1.26 ( 2.49 )	1.26 ( 0.98 )	0.34 ( -0.11 )
GASTROINTESTINAL DISORDERS	77	1.3 ( 1.02 - 1.64 )	1.26 ( 4.67 )	1.26 ( 1.04 )	0.34 ( -0.01 )
BLOOD AND LYMPHATIC SYSTEM DISORDERS	76	6.88 ( 5.42 - 8.73 )	6.25 ( 340.94 )	6.25 ( 5.12 )	2.64 ( 2.3 )
NERVOUS SYSTEM DISORDERS	34	0.54 ( 0.38 - 0.77 )	0.56 ( 12.52 )	0.56 ( 0.42 )	-0.83 ( -1.33 )
INJURY, POISONING AND PROCEDURAL COMPLICATIONS	27	0.38 ( 0.26 - 0.55 )	0.4 ( 26.62 )	0.4 ( 0.29 )	-1.32 ( -1.87 )
INVESTIGATIONS	80	1.92 ( 1.52 - 2.42 )	1.81 ( 31.17 )	1.81 ( 1.49 )	0.86 ( 0.52 )
MUSCULOSKELETAL AND CONNECTIVE TISSUE DISORDERS	16	0.41 ( 0.25 - 0.68 )	0.43 ( 13.1 )	0.43 ( 0.28 )	-1.23 ( -1.94 )
NEOPLASMS BENIGN, MALIGNANT AND UNSPECIFIED (INCL CYSTS AND POLYPS)	41	2.25 ( 1.64 - 3.09 )	2.18 ( 26.94 )	2.18 ( 1.68 )	1.13 ( 0.67 )
GENERAL DISORDERS AND ADMINISTRATION SITE CONDITIONS	109	0.86 ( 0.7 - 1.05 )	0.88 ( 2.23 )	0.88 ( 0.74 )	-0.19 ( -0.48 )
SKIN AND SUBCUTANEOUS TISSUE DISORDERS	47	1.24 ( 0.92 - 1.67 )	1.22 ( 2.03 )	1.22 ( 0.96 )	0.29 ( -0.14 )
RENAL AND URINARY DISORDERS	7	0.53 ( 0.25 - 1.12 )	0.53 ( 2.89 )	0.53 ( 0.29 )	-0.9 ( -1.93 )
METABOLISM AND NUTRITION DISORDERS	41	2.78 ( 2.03 - 3.82 )	2.68 ( 44.14 )	2.68 ( 2.06 )	1.42 ( 0.96 )
INFECTIONS AND INFESTATIONS	46	1.24 ( 0.92 - 1.67 )	1.22 ( 1.96 )	1.22 ( 0.95 )	0.29 ( -0.15 )
VASCULAR DISORDERS	18	1.18 ( 0.74 - 1.88 )	1.17 ( 0.47 )	1.17 ( 0.79 )	0.23 ( -0.44 )
PSYCHIATRIC DISORDERS	5	0.12 ( 0.05 - 0.28 )	0.12 ( 32.95 )	0.12 ( 0.06 )	-3.02 ( -4.2 )
HEPATOBILIARY DISORDERS	17	2.65 ( 1.64 - 4.28 )	2.61 ( 17.01 )	2.61 ( 1.74 )	1.38 ( 0.69 )
REPRODUCTIVE SYSTEM AND BREAST DISORDERS	2	0.34 ( 0.09 - 1.37 )	0.34 ( 2.54 )	0.34 ( 0.11 )	-1.54 ( -3.21 )
EAR AND LABYRINTH DISORDERS	1	0.33 ( 0.05 - 2.31 )	0.33 ( 1.4 )	0.33 ( 0.06 )	-1.62 ( -3.66 )
ENDOCRINE DISORDERS	8	4.44 ( 2.21 - 8.91 )	4.4 ( 21.08 )	4.4 ( 2.46 )	2.14 ( 1.17 )
PREGNANCY, PUERPERIUM AND PERINATAL CONDITIONS	1	0.33 ( 0.05 - 2.32 )	0.33 ( 1.38 )	0.33 ( 0.06 )	-1.61 ( -3.65 )
CARDIAC DISORDERS	7	0.37 ( 0.17 - 0.77 )	0.37 ( 7.62 )	0.37 ( 0.2 )	-1.43 ( -2.45 )
SURGICAL AND MEDICAL PROCEDURES	1	0.1 ( 0.01 - 0.72 )	0.1 ( 7.9 )	0.1 ( 0.02 )	-3.28 ( -5.32 )
IMMUNE SYSTEM DISORDERS	2	0.25 ( 0.06 - 1 )	0.25 ( 4.49 )	0.25 ( 0.08 )	-1.99 ( -3.66 )
CONGENITAL, FAMILIAL AND GENETIC DISORDERS	1	0.46 ( 0.06 - 3.27 )	0.46 ( 0.63 )	0.46 ( 0.09 )	-1.12 ( -3.16 )

## Sheet: Gemcitabine +Nivolumab
soc_name_en	a	ROR(95%Cl)	PRR(Chi-square)	EBGM(EBGM05)	IC(IC025)
GENERAL DISORDERS AND ADMINISTRATION SITE CONDITIONS	97	1.12 ( 0.9 - 1.4 )	1.1 ( 1.04 )	1.1 ( 0.91 )	0.14 ( -0.18 )
RESPIRATORY, THORACIC AND MEDIASTINAL DISORDERS	56	2.48 ( 1.88 - 3.27 )	2.31 ( 43.87 )	2.31 ( 1.83 )	1.21 ( 0.81 )
VASCULAR DISORDERS	11	1.01 ( 0.55 - 1.83 )	1.01 ( 0 )	1.01 ( 0.61 )	0.01 ( -0.83 )
GASTROINTESTINAL DISORDERS	44	1.02 ( 0.75 - 1.39 )	1.02 ( 0.01 )	1.02 ( 0.78 )	0.02 ( -0.43 )
HEPATOBILIARY DISORDERS	9	1.96 ( 1.01 - 3.79 )	1.94 ( 4.14 )	1.94 ( 1.12 )	0.96 ( 0.04 )
SKIN AND SUBCUTANEOUS TISSUE DISORDERS	12	0.43 ( 0.24 - 0.75 )	0.44 ( 9.09 )	0.44 ( 0.27 )	-1.19 ( -2 )
MUSCULOSKELETAL AND CONNECTIVE TISSUE DISORDERS	14	0.51 ( 0.3 - 0.87 )	0.52 ( 6.42 )	0.52 ( 0.34 )	-0.93 ( -1.69 )
METABOLISM AND NUTRITION DISORDERS	18	1.68 ( 1.05 - 2.69 )	1.65 ( 4.76 )	1.65 ( 1.12 )	0.73 ( 0.05 )
NEOPLASMS BENIGN, MALIGNANT AND UNSPECIFIED (INCL CYSTS AND POLYPS)	47	3.77 ( 2.79 - 5.1 )	3.51 ( 86.86 )	3.51 ( 2.73 )	1.81 ( 1.38 )
INFECTIONS AND INFESTATIONS	43	1.66 ( 1.22 - 2.27 )	1.61 ( 10.36 )	1.61 ( 1.24 )	0.68 ( 0.23 )
IMMUNE SYSTEM DISORDERS	1	0.18 ( 0.02 - 1.25 )	0.18 ( 3.87 )	0.18 ( 0.03 )	-2.5 ( -4.54 )
SURGICAL AND MEDICAL PROCEDURES	3	0.43 ( 0.14 - 1.34 )	0.44 ( 2.23 )	0.44 ( 0.17 )	-1.2 ( -2.65 )
PSYCHIATRIC DISORDERS	26	0.9 ( 0.61 - 1.33 )	0.9 ( 0.28 )	0.9 ( 0.65 )	-0.15 ( -0.72 )
NERVOUS SYSTEM DISORDERS	29	0.66 ( 0.45 - 0.96 )	0.68 ( 4.91 )	0.68 ( 0.49 )	-0.56 ( -1.11 )
INJURY, POISONING AND PROCEDURAL COMPLICATIONS	21	0.41 ( 0.27 - 0.64 )	0.44 ( 16.65 )	0.44 ( 0.3 )	-1.19 ( -1.82 )
CARDIAC DISORDERS	1	0.07 ( 0.01 - 0.52 )	0.07 ( 11.77 )	0.07 ( 0.01 )	-3.74 ( -5.79 )
INVESTIGATIONS	14	0.43 ( 0.25 - 0.73 )	0.45 ( 10.26 )	0.45 ( 0.29 )	-1.16 ( -1.92 )
RENAL AND URINARY DISORDERS	14	1.52 ( 0.89 - 2.58 )	1.5 ( 2.4 )	1.5 ( 0.96 )	0.59 ( -0.17 )
BLOOD AND LYMPHATIC SYSTEM DISORDERS	36	4.4 ( 3.14 - 6.18 )	4.16 ( 87.94 )	4.16 ( 3.13 )	2.06 ( 1.57 )
REPRODUCTIVE SYSTEM AND BREAST DISORDERS	5	1.21 ( 0.5 - 2.91 )	1.2 ( 0.18 )	1.2 ( 0.58 )	0.27 ( -0.92 )
CONGENITAL, FAMILIAL AND GENETIC DISORDERS	1	0.65 ( 0.09 - 4.6 )	0.65 ( 0.19 )	0.65 ( 0.13 )	-0.63 ( -2.67 )
EAR AND LABYRINTH DISORDERS	1	0.46 ( 0.06 - 3.25 )	0.46 ( 0.64 )	0.46 ( 0.09 )	-1.13 ( -3.17 )

## Sheet: Gemcitabine + Durvalumab
Supplementary Table 1 The AEs of each treatment group at the SOC level
soc_name_en	a	ROR(95%Cl)	PRR(Chi-square)	EBGM(EBGM05)	IC(IC025)
VASCULAR DISORDERS	37	2.13 ( 1.53 - 2.96 )	2.08 ( 21.13 )	2.08 ( 1.58 )	1.05 ( 0.58 )
INFECTIONS AND INFESTATIONS	127	3.26 ( 2.7 - 3.94 )	2.91 ( 167.96 )	2.91 ( 2.48 )	1.54 ( 1.27 )
RESPIRATORY, THORACIC AND MEDIASTINAL DISORDERS	41	1.04 ( 0.76 - 1.43 )	1.04 ( 0.06 )	1.04 ( 0.8 )	0.06 ( -0.4 )
ENDOCRINE DISORDERS	6	2.86 ( 1.28 - 6.38 )	2.85 ( 7.2 )	2.85 ( 1.45 )	1.51 ( 0.41 )
GASTROINTESTINAL DISORDERS	126	1.93 ( 1.59 - 2.33 )	1.78 ( 47.55 )	1.78 ( 1.52 )	0.84 ( 0.56 )
GENERAL DISORDERS AND ADMINISTRATION SITE CONDITIONS	103	0.67 ( 0.55 - 0.83 )	0.72 ( 14.12 )	0.72 ( 0.6 )	-0.48 ( -0.78 )
BLOOD AND LYMPHATIC SYSTEM DISORDERS	64	4.84 ( 3.75 - 6.24 )	4.54 ( 179.56 )	4.54 ( 3.66 )	2.18 ( 1.81 )
HEPATOBILIARY DISORDERS	41	5.66 ( 4.13 - 7.74 )	5.42 ( 149.3 )	5.42 ( 4.17 )	2.44 ( 1.98 )
METABOLISM AND NUTRITION DISORDERS	22	1.25 ( 0.82 - 1.9 )	1.24 ( 1.04 )	1.24 ( 0.87 )	0.31 ( -0.3 )
SKIN AND SUBCUTANEOUS TISSUE DISORDERS	31	0.68 ( 0.48 - 0.98 )	0.7 ( 4.36 )	0.7 ( 0.52 )	-0.52 ( -1.04 )
NERVOUS SYSTEM DISORDERS	54	0.76 ( 0.57 - 1 )	0.77 ( 3.96 )	0.77 ( 0.61 )	-0.37 ( -0.77 )
PSYCHIATRIC DISORDERS	11	0.22 ( 0.12 - 0.41 )	0.23 ( 29.16 )	0.23 ( 0.14 )	-2.09 ( -2.93 )
NEOPLASMS BENIGN, MALIGNANT AND UNSPECIFIED (INCL CYSTS AND POLYPS)	21	0.96 ( 0.62 - 1.48 )	0.96 ( 0.03 )	0.96 ( 0.67 )	-0.05 ( -0.68 )
RENAL AND URINARY DISORDERS	25	1.67 ( 1.12 - 2.48 )	1.65 ( 6.46 )	1.65 ( 1.18 )	0.72 ( 0.14 )
CARDIAC DISORDERS	20	0.91 ( 0.59 - 1.43 )	0.92 ( 0.16 )	0.92 ( 0.63 )	-0.13 ( -0.76 )
INJURY, POISONING AND PROCEDURAL COMPLICATIONS	52	0.64 ( 0.49 - 0.85 )	0.67 ( 9.58 )	0.67 ( 0.53 )	-0.58 ( -0.99 )
INVESTIGATIONS	28	0.53 ( 0.36 - 0.77 )	0.55 ( 11.17 )	0.55 ( 0.4 )	-0.87 ( -1.41 )
MUSCULOSKELETAL AND CONNECTIVE TISSUE DISORDERS	8	0.18 ( 0.09 - 0.35 )	0.18 ( 30.71 )	0.18 ( 0.1 )	-2.45 ( -3.41 )
IMMUNE SYSTEM DISORDERS	1	0.11 ( 0.02 - 0.76 )	0.11 ( 7.4 )	0.11 ( 0.02 )	-3.2 ( -5.25 )
SURGICAL AND MEDICAL PROCEDURES	1	0.09 ( 0.01 - 0.62 )	0.09 ( 9.45 )	0.09 ( 0.02 )	-3.49 ( -5.53 )
EYE DISORDERS	1	0.06 ( 0.01 - 0.42 )	0.06 ( 14.96 )	0.06 ( 0.01 )	-4.05 ( -6.1 )
