# Supplementary material for: Risk comparison of adverse reactions among gemcitabine monotherapy, gemcitabine combined with cisplatin, gemcitabine combined with PD-1/PD-L1 inhibitors treatment: insights from the FDA adverse event reporting system database
Source: Research Square preprint supplement (doi:10.21203/rs.3.rs-7907815/v1), 2025-10-22
Supplement: Supplementary file 2 [file ee9446dc66fb0d1ad9b74e29.xlsx]

## Sheet: Gemcitabine
PT	a	ROR(95%Cl)	PRR(Chi-square)	EBGM(EBGM05)	IC(IC025)
THROMBOCYTOPENIA	1368	12.81 ( 12.14 - 13.52 )	12.54 ( 14357.99 )	12.38 ( 11.84 )	3.63 ( 3.55 )
MALIGNANT NEOPLASM PROGRESSION	1246	13.17 ( 12.45 - 13.94 )	12.92 ( 13533.02 )	12.75 ( 12.16 )	3.67 ( 3.59 )
DISEASE PROGRESSION	1060	9.35 ( 8.8 - 9.94 )	9.21 ( 7690.94 )	9.12 ( 8.67 )	3.19 ( 3.1 )
PYREXIA	1057	3.08 ( 2.9 - 3.27 )	3.04 ( 1454.16 )	3.04 ( 2.89 )	1.6 ( 1.51 )
NEUTROPENIA	1052	7.98 ( 7.5 - 8.48 )	7.86 ( 6253.87 )	7.8 ( 7.41 )	2.96 ( 2.87 )
ANAEMIA	1035	5.47 ( 5.15 - 5.82 )	5.4 ( 3697.3 )	5.37 ( 5.1 )	2.43 ( 2.33 )
THROMBOTIC MICROANGIOPATHY	636	75.79 ( 69.87 - 82.21 )	74.99 ( 42890.2 )	69.34 ( 64.78 )	6.12 ( 6 )
NEOPLASM PROGRESSION	522	14.5 ( 13.29 - 15.81 )	14.38 ( 6400.56 )	14.17 ( 13.18 )	3.82 ( 3.7 )
SEPSIS	458	4.14 ( 3.78 - 4.54 )	4.12 ( 1078.6 )	4.1 ( 3.8 )	2.04 ( 1.9 )
PLATELET COUNT DECREASED	457	4.32 ( 3.94 - 4.74 )	4.3 ( 1152.05 )	4.28 ( 3.96 )	2.1 ( 1.96 )
PLEURAL EFFUSION	452	7.44 ( 6.78 - 8.16 )	7.39 ( 2480.56 )	7.34 ( 6.79 )	2.88 ( 2.74 )
GENERAL PHYSICAL HEALTH DETERIORATION	450	4.16 ( 3.8 - 4.57 )	4.14 ( 1069.2 )	4.13 ( 3.82 )	2.05 ( 1.91 )
LEUKOPENIA	442	9.02 ( 8.21 - 9.91 )	8.96 ( 3099.69 )	8.89 ( 8.21 )	3.15 ( 3.01 )
INTERSTITIAL LUNG DISEASE	436	9.4 ( 8.55 - 10.33 )	9.33 ( 3213.92 )	9.25 ( 8.54 )	3.21 ( 3.07 )
PANCYTOPENIA	435	8.06 ( 7.33 - 8.86 )	8.01 ( 2646.59 )	7.95 ( 7.34 )	2.99 ( 2.85 )
FEBRILE NEUTROPENIA	423	6.58 ( 5.98 - 7.25 )	6.54 ( 1974.73 )	6.5 ( 6 )	2.7 ( 2.56 )
OEDEMA PERIPHERAL	413	3.32 ( 3.01 - 3.66 )	3.31 ( 663.04 )	3.3 ( 3.04 )	1.72 ( 1.58 )
PULMONARY EMBOLISM	379	3.94 ( 3.56 - 4.36 )	3.92 ( 821.21 )	3.9 ( 3.59 )	1.97 ( 1.82 )
DEHYDRATION	369	2.77 ( 2.5 - 3.07 )	2.76 ( 414.37 )	2.76 ( 2.53 )	1.46 ( 1.31 )
NEUROPATHY PERIPHERAL	358	3.98 ( 3.58 - 4.41 )	3.96 ( 789.84 )	3.95 ( 3.62 )	1.98 ( 1.83 )
ACUTE KIDNEY INJURY	338	2.29 ( 2.06 - 2.55 )	2.28 ( 244.01 )	2.28 ( 2.09 )	1.19 ( 1.03 )
WHITE BLOOD CELL COUNT DECREASED	333	3.08 ( 2.76 - 3.43 )	3.07 ( 463.43 )	3.06 ( 2.8 )	1.61 ( 1.46 )
HAEMOGLOBIN DECREASED	315	3.03 ( 2.71 - 3.39 )	3.02 ( 425.12 )	3.01 ( 2.75 )	1.59 ( 1.43 )
RENAL FAILURE	314	2.28 ( 2.04 - 2.55 )	2.27 ( 223.98 )	2.27 ( 2.07 )	1.18 ( 1.02 )
HAEMOLYTIC URAEMIC SYNDROME	292	137.41 ( 121.47 - 155.45 )	136.75 ( 34190.15 )	118.95 ( 107.29 )	6.89 ( 6.71 )
DEEP VEIN THROMBOSIS	289	4.33 ( 3.86 - 4.86 )	4.32 ( 733.5 )	4.3 ( 3.9 )	2.1 ( 1.93 )
PNEUMONITIS	289	11.34 ( 10.09 - 12.74 )	11.29 ( 2677.69 )	11.16 ( 10.13 )	3.48 ( 3.31 )
ASCITES	265	9.08 ( 8.05 - 10.26 )	9.05 ( 1879.3 )	8.97 ( 8.1 )	3.16 ( 2.99 )
RESPIRATORY FAILURE	253	3.47 ( 3.07 - 3.93 )	3.46 ( 441.39 )	3.45 ( 3.11 )	1.79 ( 1.61 )
NEUTROPHIL COUNT DECREASED	226	5.72 ( 5.02 - 6.53 )	5.71 ( 872.4 )	5.68 ( 5.09 )	2.51 ( 2.31 )
BONE MARROW FAILURE	225	10.7 ( 9.38 - 12.21 )	10.67 ( 1949.18 )	10.56 ( 9.45 )	3.4 ( 3.21 )
CARDIAC FAILURE	221	2.76 ( 2.42 - 3.15 )	2.76 ( 246.99 )	2.75 ( 2.46 )	1.46 ( 1.27 )
MYELOSUPPRESSION	209	8.98 ( 7.83 - 10.29 )	8.95 ( 1461.79 )	8.87 ( 7.91 )	3.15 ( 2.95 )
HAEMATOTOXICITY	198	24.14 ( 20.96 - 27.8 )	24.06 ( 4263.72 )	23.46 ( 20.85 )	4.55 ( 4.34 )
SEPTIC SHOCK	195	4.66 ( 4.05 - 5.37 )	4.65 ( 556.4 )	4.63 ( 4.12 )	2.21 ( 2 )
CHOLANGITIS	181	32.82 ( 28.29 - 38.08 )	32.73 ( 5373.25 )	31.62 ( 27.92 )	4.98 ( 4.76 )
ASPARTATE AMINOTRANSFERASE INCREASED	176	3.28 ( 2.82 - 3.8 )	3.27 ( 276.42 )	3.26 ( 2.88 )	1.71 ( 1.49 )
ALANINE AMINOTRANSFERASE INCREASED	173	2.79 ( 2.4 - 3.24 )	2.78 ( 197.18 )	2.78 ( 2.45 )	1.47 ( 1.25 )
LUNG DISORDER	164	3.42 ( 2.94 - 3.99 )	3.42 ( 279.69 )	3.41 ( 3 )	1.77 ( 1.54 )
MUCOSAL INFLAMMATION	161	6.33 ( 5.42 - 7.39 )	6.32 ( 715.61 )	6.28 ( 5.51 )	2.65 ( 2.42 )
METASTASES TO LIVER	151	8.93 ( 7.61 - 10.49 )	8.91 ( 1050.95 )	8.84 ( 7.73 )	3.14 ( 2.91 )
PERICARDIAL EFFUSION	145	6.51 ( 5.53 - 7.66 )	6.49 ( 669.52 )	6.46 ( 5.63 )	2.69 ( 2.45 )
NEUTROPENIC SEPSIS	143	19.95 ( 16.9 - 23.55 )	19.91 ( 2512.76 )	19.5 ( 16.97 )	4.29 ( 4.04 )
RECALL PHENOMENON	143	210.18 ( 175.2 - 252.15 )	209.68 ( 24118.71 )	170.47 ( 146.38 )	7.41 ( 7.15 )
PULMONARY OEDEMA	134	2.98 ( 2.52 - 3.53 )	2.98 ( 175.59 )	2.97 ( 2.58 )	1.57 ( 1.32 )
HYPOXIA	133	3.87 ( 3.26 - 4.59 )	3.86 ( 281.03 )	3.85 ( 3.34 )	1.94 ( 1.69 )
OEDEMA	131	2.46 ( 2.08 - 2.93 )	2.46 ( 113.43 )	2.46 ( 2.13 )	1.3 ( 1.05 )
BLOOD ALKALINE PHOSPHATASE INCREASED	130	5.07 ( 4.27 - 6.03 )	5.07 ( 422.05 )	5.04 ( 4.37 )	2.33 ( 2.08 )
DISEASE RECURRENCE	130	2.72 ( 2.29 - 3.23 )	2.71 ( 140.12 )	2.71 ( 2.34 )	1.44 ( 1.18 )
HYPOKALAEMIA	124	2.73 ( 2.29 - 3.26 )	2.73 ( 135.58 )	2.72 ( 2.35 )	1.45 ( 1.19 )
CAPILLARY LEAK SYNDROME	123	68.48 ( 57 - 82.26 )	68.34 ( 7589.33 )	63.62 ( 54.56 )	5.99 ( 5.72 )
MYOSITIS	122	14.64 ( 12.24 - 17.51 )	14.61 ( 1522.89 )	14.4 ( 12.39 )	3.85 ( 3.59 )
PANCREATIC CARCINOMA	121	4.02 ( 3.37 - 4.81 )	4.02 ( 273.17 )	4 ( 3.45 )	2 ( 1.74 )
PULMONARY TOXICITY	121	18.69 ( 15.61 - 22.38 )	18.66 ( 1981.41 )	18.3 ( 15.74 )	4.19 ( 3.93 )
NEUROTOXICITY	120	7.37 ( 6.16 - 8.83 )	7.36 ( 654.35 )	7.31 ( 6.29 )	2.87 ( 2.61 )
DISSEMINATED INTRAVASCULAR COAGULATION	119	8.31 ( 6.94 - 9.96 )	8.3 ( 756.78 )	8.23 ( 7.07 )	3.04 ( 2.78 )
ACUTE RESPIRATORY DISTRESS SYNDROME	116	6.61 ( 5.51 - 7.94 )	6.6 ( 547.71 )	6.56 ( 5.63 )	2.71 ( 2.45 )
PALMAR-PLANTAR ERYTHRODYSAESTHESIA SYNDROME	115	4.95 ( 4.12 - 5.95 )	4.95 ( 360.33 )	4.93 ( 4.22 )	2.3 ( 2.03 )
HEPATIC FAILURE	113	3.74 ( 3.11 - 4.5 )	3.73 ( 225.49 )	3.72 ( 3.19 )	1.9 ( 1.63 )
C-REACTIVE PROTEIN INCREASED	112	3.12 ( 2.59 - 3.75 )	3.11 ( 160.11 )	3.11 ( 2.66 )	1.63 ( 1.36 )
GENERALISED OEDEMA	108	9.02 ( 7.46 - 10.91 )	9.01 ( 761.31 )	8.93 ( 7.62 )	3.16 ( 2.88 )
THROMBOCYTOSIS	107	31.53 ( 25.99 - 38.23 )	31.47 ( 3050.98 )	30.45 ( 25.91 )	4.93 ( 4.65 )
BLOOD BILIRUBIN INCREASED	107	3.9 ( 3.22 - 4.71 )	3.89 ( 229.1 )	3.88 ( 3.31 )	1.96 ( 1.68 )
THROMBOTIC THROMBOCYTOPENIC PURPURA	100	28.82 ( 23.62 - 35.18 )	28.78 ( 2598.77 )	27.92 ( 23.63 )	4.8 ( 4.51 )
CEREBRAL INFARCTION	99	4.01 ( 3.29 - 4.88 )	4 ( 222.12 )	3.99 ( 3.38 )	2 ( 1.71 )
GASTROINTESTINAL TOXICITY	99	23.7 ( 19.41 - 28.93 )	23.66 ( 2093.82 )	23.08 ( 19.53 )	4.53 ( 4.24 )
PANCREATIC CARCINOMA METASTATIC	98	34.56 ( 28.24 - 42.29 )	34.5 ( 3071.16 )	33.27 ( 28.1 )	5.06 ( 4.76 )
COLITIS	97	2.73 ( 2.24 - 3.33 )	2.73 ( 105.92 )	2.72 ( 2.3 )	1.45 ( 1.15 )
BLOOD LACTATE DEHYDROGENASE INCREASED	97	5.83 ( 4.77 - 7.12 )	5.82 ( 385.09 )	5.79 ( 4.9 )	2.53 ( 2.24 )
DYSPNOEA EXERTIONAL	94	2.56 ( 2.09 - 3.14 )	2.56 ( 89.19 )	2.56 ( 2.16 )	1.35 ( 1.06 )
HEPATOCELLULAR INJURY	92	6.3 ( 5.13 - 7.73 )	6.29 ( 406.42 )	6.25 ( 5.27 )	2.64 ( 2.34 )
CHOLESTASIS	88	4.72 ( 3.82 - 5.82 )	4.71 ( 255.91 )	4.69 ( 3.94 )	2.23 ( 1.92 )
JAUNDICE	87	3.17 ( 2.57 - 3.91 )	3.17 ( 128.53 )	3.16 ( 2.65 )	1.66 ( 1.35 )
POSTERIOR REVERSIBLE ENCEPHALOPATHY SYNDROME	85	9.45 ( 7.63 - 11.71 )	9.44 ( 634.93 )	9.35 ( 7.82 )	3.23 ( 2.91 )
POLYNEUROPATHY	84	7.32 ( 5.9 - 9.07 )	7.31 ( 453.73 )	7.26 ( 6.06 )	2.86 ( 2.54 )
HAEMOLYTIC ANAEMIA	83	9.33 ( 7.51 - 11.58 )	9.31 ( 609.82 )	9.23 ( 7.7 )	3.21 ( 2.89 )
TRANSAMINASES INCREASED	82	3.71 ( 2.99 - 4.61 )	3.71 ( 161.35 )	3.69 ( 3.08 )	1.89 ( 1.57 )
GAMMA-GLUTAMYLTRANSFERASE INCREASED	82	3.58 ( 2.88 - 4.45 )	3.58 ( 151.87 )	3.57 ( 2.98 )	1.84 ( 1.52 )
DRUG RESISTANCE	82	3.26 ( 2.63 - 4.06 )	3.26 ( 128.17 )	3.25 ( 2.71 )	1.7 ( 1.38 )
PERIPHERAL ISCHAEMIA	81	20.12 ( 16.14 - 25.08 )	20.09 ( 1437.8 )	19.68 ( 16.37 )	4.3 ( 3.98 )
METASTASES TO LUNG	78	7.06 ( 5.65 - 8.82 )	7.05 ( 401.9 )	7 ( 5.81 )	2.81 ( 2.48 )
CARDIOMYOPATHY	76	5.09 ( 4.06 - 6.38 )	5.09 ( 248.18 )	5.06 ( 4.19 )	2.34 ( 2.01 )
RASH MACULO-PAPULAR	76	3.52 ( 2.81 - 4.41 )	3.52 ( 136.42 )	3.51 ( 2.9 )	1.81 ( 1.48 )
HYPOALBUMINAEMIA	75	10.1 ( 8.04 - 12.68 )	10.09 ( 607.35 )	9.99 ( 8.26 )	3.32 ( 2.99 )
HAEMATOCRIT DECREASED	74	3.57 ( 2.84 - 4.48 )	3.56 ( 136.03 )	3.55 ( 2.94 )	1.83 ( 1.5 )
HYPERTRANSAMINASAEMIA	72	12.62 ( 10 - 15.93 )	12.61 ( 759.15 )	12.45 ( 10.25 )	3.64 ( 3.3 )
PULMONARY FIBROSIS	71	3.85 ( 3.05 - 4.87 )	3.85 ( 149.28 )	3.84 ( 3.16 )	1.94 ( 1.6 )
ACUTE MYELOID LEUKAEMIA	70	4.6 ( 3.63 - 5.81 )	4.59 ( 195.78 )	4.57 ( 3.76 )	2.19 ( 1.85 )
TUMOUR LYSIS SYNDROME	70	8.46 ( 6.69 - 10.71 )	8.46 ( 455.97 )	8.39 ( 6.89 )	3.07 ( 2.72 )
PSEUDOCELLULITIS	70	1041.09 ( 738.51 - 1467.66 )	1039.87 ( 33830.08 )	484.75 ( 363.69 )	8.92 ( 8.5 )
PNEUMOCYSTIS JIROVECII PNEUMONIA	69	7.26 ( 5.73 - 9.2 )	7.25 ( 368.89 )	7.2 ( 5.91 )	2.85 ( 2.5 )
HAEMOPTYSIS	69	2.45 ( 1.94 - 3.11 )	2.45 ( 59.12 )	2.45 ( 2.01 )	1.29 ( 0.95 )
EMBOLISM	68	8.05 ( 6.34 - 10.22 )	8.04 ( 415.77 )	7.98 ( 6.54 )	3 ( 2.65 )
NEPHROPATHY TOXIC	67	6.38 ( 5.02 - 8.12 )	6.38 ( 301.77 )	6.34 ( 5.19 )	2.66 ( 2.31 )
LEUKOCYTOSIS	63	3.53 ( 2.76 - 4.53 )	3.53 ( 113.85 )	3.52 ( 2.86 )	1.82 ( 1.45 )
LUNG INFILTRATION	62	6.64 ( 5.17 - 8.53 )	6.64 ( 294.78 )	6.6 ( 5.35 )	2.72 ( 2.36 )
PLATELET COUNT INCREASED	62	4.7 ( 3.67 - 6.04 )	4.7 ( 179.76 )	4.68 ( 3.8 )	2.23 ( 1.86 )
PNEUMOTHORAX	59	3.77 ( 2.92 - 4.87 )	3.77 ( 119.43 )	3.76 ( 3.03 )	1.91 ( 1.54 )
HEPATOTOXICITY	59	2.75 ( 2.13 - 3.55 )	2.74 ( 65.26 )	2.74 ( 2.21 )	1.45 ( 1.08 )
CYTOPENIA	59	5.54 ( 4.29 - 7.16 )	5.54 ( 218.17 )	5.51 ( 4.45 )	2.46 ( 2.09 )
VASCULITIS	55	4.76 ( 3.65 - 6.2 )	4.75 ( 162.26 )	4.74 ( 3.79 )	2.24 ( 1.86 )
ACUTE RESPIRATORY FAILURE	55	2.97 ( 2.28 - 3.86 )	2.96 ( 71.36 )	2.96 ( 2.37 )	1.56 ( 1.18 )
BACTERAEMIA	55	4.86 ( 3.73 - 6.34 )	4.86 ( 167.7 )	4.84 ( 3.88 )	2.27 ( 1.89 )
CARDIOTOXICITY	55	6.65 ( 5.1 - 8.68 )	6.65 ( 262.07 )	6.61 ( 5.29 )	2.72 ( 2.34 )
JAUNDICE CHOLESTATIC	54	15.42 ( 11.78 - 20.18 )	15.4 ( 715.13 )	15.16 ( 12.1 )	3.92 ( 3.53 )
METASTASES TO CENTRAL NERVOUS SYSTEM	54	4.46 ( 3.41 - 5.82 )	4.45 ( 143.91 )	4.44 ( 3.55 )	2.15 ( 1.76 )
LIVER ABSCESS	51	16.57 ( 12.56 - 21.86 )	16.56 ( 732.23 )	16.28 ( 12.91 )	4.02 ( 3.62 )
NEPHROTIC SYNDROME	51	7.6 ( 5.77 - 10.02 )	7.6 ( 289.78 )	7.54 ( 5.99 )	2.92 ( 2.51 )
PERFORMANCE STATUS DECREASED	50	10.58 ( 8 - 13.98 )	10.57 ( 428.34 )	10.46 ( 8.28 )	3.39 ( 2.98 )
CYANOSIS	50	3.15 ( 2.38 - 4.15 )	3.14 ( 72.91 )	3.14 ( 2.49 )	1.65 ( 1.24 )
PULMONARY ALVEOLAR HAEMORRHAGE	49	9.11 ( 6.87 - 12.07 )	9.1 ( 349.93 )	9.02 ( 7.13 )	3.17 ( 2.76 )
AGRANULOCYTOSIS	49	2.77 ( 2.09 - 3.66 )	2.76 ( 55.05 )	2.76 ( 2.18 )	1.46 ( 1.06 )
THERAPY PARTIAL RESPONDER	49	4.24 ( 3.2 - 5.61 )	4.24 ( 120.65 )	4.22 ( 3.34 )	2.08 ( 1.67 )
BLOOD ALBUMIN DECREASED	48	6.04 ( 4.54 - 8.02 )	6.03 ( 200.19 )	6 ( 4.73 )	2.58 ( 2.17 )
RENAL TUBULAR NECROSIS	48	4.93 ( 3.72 - 6.55 )	4.93 ( 149.66 )	4.91 ( 3.87 )	2.3 ( 1.88 )
MYELODYSPLASTIC SYNDROME	48	3.29 ( 2.48 - 4.37 )	3.29 ( 76.24 )	3.28 ( 2.59 )	1.71 ( 1.3 )
METASTASES TO BONE	48	3.09 ( 2.33 - 4.1 )	3.09 ( 67.58 )	3.08 ( 2.43 )	1.62 ( 1.21 )
PROTEINURIA	48	2.64 ( 1.99 - 3.51 )	2.64 ( 48.8 )	2.64 ( 2.08 )	1.4 ( 0.99 )
UPPER GASTROINTESTINAL HAEMORRHAGE	48	2.8 ( 2.11 - 3.71 )	2.8 ( 55.2 )	2.79 ( 2.2 )	1.48 ( 1.07 )
SKIN NECROSIS	47	8.99 ( 6.74 - 11.98 )	8.98 ( 330.21 )	8.91 ( 7 )	3.15 ( 2.74 )
PURPURA	45	5.03 ( 3.75 - 6.75 )	5.03 ( 144.49 )	5.01 ( 3.92 )	2.32 ( 1.9 )
ATYPICAL HAEMOLYTIC URAEMIC SYNDROME	45	64.26 ( 47.49 - 86.96 )	64.22 ( 2615.18 )	60.03 ( 46.61 )	5.91 ( 5.47 )
OESOPHAGITIS	44	4.08 ( 3.03 - 5.48 )	4.08 ( 101.68 )	4.06 ( 3.17 )	2.02 ( 1.59 )
SINUS TACHYCARDIA	44	3.1 ( 2.3 - 4.16 )	3.1 ( 62.23 )	3.09 ( 2.41 )	1.63 ( 1.2 )
SUBACUTE CUTANEOUS LUPUS ERYTHEMATOSUS	43	26.31 ( 19.43 - 35.63 )	26.29 ( 1016.74 )	25.58 ( 19.85 )	4.68 ( 4.24 )
BILIARY TRACT INFECTION	43	77.83 ( 57 - 106.28 )	77.78 ( 3001.34 )	71.71 ( 55.25 )	6.16 ( 5.71 )
LYMPHOPENIA	43	3.1 ( 2.29 - 4.18 )	3.09 ( 60.76 )	3.09 ( 2.4 )	1.63 ( 1.19 )
ENTEROCOLITIS	42	8.01 ( 5.91 - 10.85 )	8 ( 255.19 )	7.94 ( 6.16 )	2.99 ( 2.55 )
EJECTION FRACTION DECREASED	41	2.62 ( 1.93 - 3.57 )	2.62 ( 41.09 )	2.62 ( 2.03 )	1.39 ( 0.94 )
METASTASES TO PERITONEUM	41	17.69 ( 12.98 - 24.09 )	17.68 ( 632.69 )	17.36 ( 13.4 )	4.12 ( 3.67 )
ILEUS	40	3.37 ( 2.47 - 4.6 )	3.37 ( 66.46 )	3.36 ( 2.59 )	1.75 ( 1.3 )
UROSEPSIS	40	4.38 ( 3.21 - 5.98 )	4.38 ( 103.8 )	4.36 ( 3.36 )	2.13 ( 1.67 )
HYPERBILIRUBINAEMIA	40	3.98 ( 2.92 - 5.43 )	3.98 ( 88.78 )	3.96 ( 3.06 )	1.99 ( 1.54 )
ALVEOLITIS	40	27.54 ( 20.11 - 37.73 )	27.52 ( 992.24 )	26.74 ( 20.55 )	4.74 ( 4.28 )
ENTERITIS	40	6.67 ( 4.89 - 9.1 )	6.66 ( 191.19 )	6.62 ( 5.1 )	2.73 ( 2.28 )
ACUTE PULMONARY OEDEMA	39	6.92 ( 5.05 - 9.48 )	6.91 ( 195.79 )	6.87 ( 5.28 )	2.78 ( 2.32 )
INFUSION SITE PAIN	39	3.28 ( 2.4 - 4.5 )	3.28 ( 61.66 )	3.27 ( 2.52 )	1.71 ( 1.25 )
CARBOHYDRATE ANTIGEN 19-9 INCREASED	39	86.46 ( 62.25 - 120.1 )	86.41 ( 3005.78 )	78.97 ( 59.99 )	6.3 ( 5.83 )
HYDRONEPHROSIS	39	5.3 ( 3.87 - 7.26 )	5.29 ( 135.05 )	5.27 ( 4.05 )	2.4 ( 1.94 )
NEUTROPHIL COUNT INCREASED	38	3.63 ( 2.64 - 4.99 )	3.63 ( 71.97 )	3.62 ( 2.77 )	1.85 ( 1.39 )
LYMPHOEDEMA	38	5.67 ( 4.12 - 7.81 )	5.67 ( 145.31 )	5.64 ( 4.32 )	2.5 ( 2.03 )
DUODENAL ULCER	38	5.43 ( 3.95 - 7.47 )	5.43 ( 136.4 )	5.4 ( 4.13 )	2.43 ( 1.97 )
INTESTINAL PERFORATION	37	3.37 ( 2.44 - 4.65 )	3.37 ( 61.36 )	3.36 ( 2.56 )	1.75 ( 1.28 )
PERIPHERAL SENSORY NEUROPATHY	37	6.62 ( 4.79 - 9.14 )	6.61 ( 175.02 )	6.57 ( 5.01 )	2.72 ( 2.25 )
MICROANGIOPATHIC HAEMOLYTIC ANAEMIA	37	49.41 ( 35.49 - 68.79 )	49.38 ( 1663.18 )	46.88 ( 35.54 )	5.55 ( 5.07 )
EXTREMITY NECROSIS	37	21.76 ( 15.7 - 30.15 )	21.74 ( 715.08 )	21.26 ( 16.18 )	4.41 ( 3.94 )
SMALL INTESTINAL OBSTRUCTION	36	3 ( 2.16 - 4.16 )	3 ( 47.77 )	2.99 ( 2.27 )	1.58 ( 1.11 )
LEFT VENTRICULAR DYSFUNCTION	36	5.53 ( 3.99 - 7.68 )	5.53 ( 132.86 )	5.5 ( 4.18 )	2.46 ( 1.98 )
HOSPICE CARE	36	3.85 ( 2.77 - 5.34 )	3.84 ( 75.46 )	3.83 ( 2.91 )	1.94 ( 1.46 )
POST THROMBOTIC SYNDROME	36	83.91 ( 59.63 - 118.07 )	83.86 ( 2697.82 )	76.84 ( 57.74 )	6.26 ( 5.77 )
ATELECTASIS	35	3.51 ( 2.52 - 4.89 )	3.51 ( 62.58 )	3.5 ( 2.65 )	1.81 ( 1.33 )
METASTASIS	35	4.97 ( 3.56 - 6.92 )	4.96 ( 110.18 )	4.94 ( 3.74 )	2.31 ( 1.82 )
AORTIC THROMBOSIS	35	32.85 ( 23.44 - 46.03 )	32.83 ( 1042.45 )	31.72 ( 23.92 )	4.99 ( 4.5 )
PETECHIAE	35	3.39 ( 2.43 - 4.73 )	3.39 ( 58.79 )	3.38 ( 2.56 )	1.76 ( 1.28 )
HAEMOLYSIS	34	4.42 ( 3.15 - 6.19 )	4.42 ( 89.42 )	4.4 ( 3.32 )	2.14 ( 1.65 )
TROPONIN INCREASED	34	4.88 ( 3.48 - 6.83 )	4.87 ( 104.15 )	4.85 ( 3.66 )	2.28 ( 1.79 )
METASTASES TO LYMPH NODES	34	5.33 ( 3.81 - 7.47 )	5.33 ( 118.96 )	5.31 ( 4 )	2.41 ( 1.92 )
PHLEBITIS	34	6.5 ( 4.64 - 9.11 )	6.5 ( 157.12 )	6.46 ( 4.87 )	2.69 ( 2.2 )
THROMBOPHLEBITIS	32	8.89 ( 6.27 - 12.59 )	8.88 ( 221.65 )	8.8 ( 6.58 )	3.14 ( 2.63 )
FAILURE TO THRIVE	32	5.98 ( 4.22 - 8.46 )	5.98 ( 131.71 )	5.94 ( 4.44 )	2.57 ( 2.07 )
STRESS CARDIOMYOPATHY	32	5.9 ( 4.17 - 8.36 )	5.9 ( 129.35 )	5.87 ( 4.39 )	2.55 ( 2.05 )
HYPERPYREXIA	32	8.68 ( 6.12 - 12.29 )	8.67 ( 215.13 )	8.6 ( 6.43 )	3.1 ( 2.6 )
TOXIC SKIN ERUPTION	32	3.19 ( 2.26 - 4.52 )	3.19 ( 47.98 )	3.18 ( 2.38 )	1.67 ( 1.17 )
REFRACTORY CANCER	32	188.4 ( 128.73 - 275.73 )	188.3 ( 4936.01 )	156.07 ( 113.48 )	7.29 ( 6.74 )
HYPERTENSIVE CRISIS	31	2.76 ( 1.94 - 3.93 )	2.76 ( 34.77 )	2.76 ( 2.05 )	1.46 ( 0.95 )
ERYSIPELAS	31	6.12 ( 4.3 - 8.71 )	6.12 ( 131.83 )	6.08 ( 4.53 )	2.6 ( 2.09 )
CARDIAC FAILURE ACUTE	31	4.83 ( 3.39 - 6.88 )	4.83 ( 93.61 )	4.81 ( 3.58 )	2.27 ( 1.75 )
NECROSIS	31	5.52 ( 3.88 - 7.86 )	5.52 ( 114.09 )	5.49 ( 4.09 )	2.46 ( 1.95 )
SECOND PRIMARY MALIGNANCY	31	3.72 ( 2.61 - 5.29 )	3.72 ( 61.29 )	3.7 ( 2.76 )	1.89 ( 1.38 )
HEPATITIS CHOLESTATIC	31	5.38 ( 3.78 - 7.66 )	5.38 ( 109.88 )	5.35 ( 3.98 )	2.42 ( 1.91 )
ELECTROLYTE IMBALANCE	30	2.71 ( 1.9 - 3.88 )	2.71 ( 32.36 )	2.71 ( 2.01 )	1.44 ( 0.92 )
ADENOCARCINOMA PANCREAS	30	23.01 ( 16.01 - 33.06 )	23 ( 615.67 )	22.45 ( 16.58 )	4.49 ( 3.96 )
BLOOD MAGNESIUM DECREASED	30	3.53 ( 2.47 - 5.06 )	3.53 ( 54.22 )	3.52 ( 2.61 )	1.82 ( 1.3 )
ORGANISING PNEUMONIA	30	6.45 ( 4.5 - 9.24 )	6.45 ( 137.13 )	6.41 ( 4.75 )	2.68 ( 2.16 )
HEPATIC CYTOLYSIS	30	3.31 ( 2.31 - 4.74 )	3.31 ( 48.15 )	3.3 ( 2.44 )	1.72 ( 1.2 )
FEBRILE BONE MARROW APLASIA	29	7.26 ( 5.04 - 10.47 )	7.26 ( 155.34 )	7.21 ( 5.31 )	2.85 ( 2.32 )
VENOUS THROMBOSIS	29	7.39 ( 5.13 - 10.66 )	7.39 ( 158.95 )	7.34 ( 5.4 )	2.88 ( 2.35 )
RAYNAUD'S PHENOMENON	28	5.75 ( 3.97 - 8.34 )	5.75 ( 109.14 )	5.72 ( 4.19 )	2.52 ( 1.98 )
SYSTEMIC INFLAMMATORY RESPONSE SYNDROME	28	7.36 ( 5.07 - 10.67 )	7.35 ( 152.45 )	7.3 ( 5.35 )	2.87 ( 2.33 )
PNEUMONIA BACTERIAL	28	3.26 ( 2.25 - 4.73 )	3.26 ( 43.72 )	3.25 ( 2.38 )	1.7 ( 1.16 )
HEPATIC ENCEPHALOPATHY	28	2.95 ( 2.04 - 4.28 )	2.95 ( 35.96 )	2.94 ( 2.16 )	1.56 ( 1.02 )
MALIGNANT ASCITES	28	38.17 ( 26.15 - 55.72 )	38.15 ( 972.15 )	36.65 ( 26.71 )	5.2 ( 4.65 )
FLANK PAIN	28	3.01 ( 2.08 - 4.36 )	3.01 ( 37.47 )	3 ( 2.2 )	1.59 ( 1.05 )
LARGE INTESTINE PERFORATION	27	3.94 ( 2.7 - 5.74 )	3.93 ( 58.84 )	3.92 ( 2.86 )	1.97 ( 1.42 )
CEREBRAL ISCHAEMIA	27	5.01 ( 3.43 - 7.31 )	5.01 ( 86.1 )	4.98 ( 3.63 )	2.32 ( 1.77 )
ISCHAEMIA	26	5.47 ( 3.72 - 8.04 )	5.47 ( 94.36 )	5.44 ( 3.94 )	2.44 ( 1.89 )
CHOLANGITIS ACUTE	26	38.45 ( 25.97 - 56.94 )	38.43 ( 909.42 )	36.91 ( 26.58 )	5.21 ( 4.64 )
PORTAL VEIN THROMBOSIS	26	8.33 ( 5.66 - 12.25 )	8.33 ( 166.06 )	8.26 ( 5.98 )	3.05 ( 2.49 )
RETINOPATHY	26	6.93 ( 4.71 - 10.19 )	6.92 ( 130.77 )	6.88 ( 4.98 )	2.78 ( 2.22 )
NON-SMALL CELL LUNG CANCER	26	5.75 ( 3.91 - 8.45 )	5.74 ( 101.23 )	5.71 ( 4.14 )	2.51 ( 1.96 )
LEFT VENTRICULAR FAILURE	26	7.45 ( 5.07 - 10.96 )	7.45 ( 143.98 )	7.4 ( 5.35 )	2.89 ( 2.33 )
ACUTE CORONARY SYNDROME	25	2.9 ( 1.96 - 4.3 )	2.9 ( 31.1 )	2.9 ( 2.09 )	1.53 ( 0.97 )
RADIATION PNEUMONITIS	25	11.87 ( 8 - 17.62 )	11.87 ( 245.58 )	11.73 ( 8.43 )	3.55 ( 2.98 )
LIVEDO RETICULARIS	25	12.21 ( 8.23 - 18.12 )	12.21 ( 253.79 )	12.06 ( 8.67 )	3.59 ( 3.02 )
BLOOD DISORDER	24	2.97 ( 1.99 - 4.44 )	2.97 ( 31.32 )	2.97 ( 2.12 )	1.57 ( 0.99 )
ESCHERICHIA INFECTION	24	3.05 ( 2.04 - 4.56 )	3.05 ( 32.99 )	3.04 ( 2.18 )	1.61 ( 1.03 )
HICCUPS	24	3.04 ( 2.04 - 4.54 )	3.04 ( 32.76 )	3.03 ( 2.17 )	1.6 ( 1.02 )
MALIGNANT PLEURAL EFFUSION	23	13.82 ( 9.15 - 20.86 )	13.81 ( 269.24 )	13.62 ( 9.65 )	3.77 ( 3.17 )
ARTERIOSPASM CORONARY	23	6.11 ( 4.05 - 9.21 )	6.11 ( 97.57 )	6.07 ( 4.31 )	2.6 ( 2.01 )
BLADDER CANCER RECURRENT	23	23.48 ( 15.52 - 35.52 )	23.47 ( 482.32 )	22.9 ( 16.2 )	4.52 ( 3.92 )
HYPERTHERMIA	23	3.05 ( 2.02 - 4.59 )	3.04 ( 31.48 )	3.04 ( 2.16 )	1.6 ( 1.01 )
CACHEXIA	22	4.22 ( 2.77 - 6.41 )	4.21 ( 53.7 )	4.2 ( 2.96 )	2.07 ( 1.47 )
EMBOLISM VENOUS	22	7.5 ( 4.93 - 11.41 )	7.5 ( 122.87 )	7.44 ( 5.24 )	2.9 ( 2.29 )
ERYTHROPENIA	22	73.32 ( 47.48 - 113.22 )	73.29 ( 1451.38 )	67.88 ( 47.19 )	6.08 ( 5.46 )
LYMPHANGIOSIS CARCINOMATOSA	21	20.29 ( 13.17 - 31.28 )	20.29 ( 376.65 )	19.87 ( 13.83 )	4.31 ( 3.69 )
VENTRICULAR HYPOKINESIA	20	6.07 ( 3.91 - 9.42 )	6.07 ( 84.13 )	6.04 ( 4.18 )	2.59 ( 1.96 )
COLITIS ISCHAEMIC	20	3.07 ( 1.98 - 4.76 )	3.06 ( 27.73 )	3.06 ( 2.12 )	1.61 ( 0.98 )
ANGIOPATHY	20	3.5 ( 2.25 - 5.42 )	3.49 ( 35.48 )	3.49 ( 2.41 )	1.8 ( 1.17 )
TUMOUR MARKER INCREASED	20	4.15 ( 2.68 - 6.44 )	4.15 ( 47.61 )	4.14 ( 2.86 )	2.05 ( 1.42 )
CARDIAC TAMPONADE	20	4.21 ( 2.71 - 6.53 )	4.2 ( 48.62 )	4.19 ( 2.9 )	2.07 ( 1.44 )
SKIN TOXICITY	20	3.97 ( 2.56 - 6.16 )	3.97 ( 44.22 )	3.96 ( 2.74 )	1.98 ( 1.35 )
CARDIOPULMONARY FAILURE	20	4.98 ( 3.21 - 7.73 )	4.98 ( 63.23 )	4.96 ( 3.43 )	2.31 ( 1.68 )
SCLERODERMA	20	5.37 ( 3.46 - 8.33 )	5.37 ( 70.68 )	5.34 ( 3.7 )	2.42 ( 1.79 )
GASTROINTESTINAL PERFORATION	19	4.62 ( 2.95 - 7.26 )	4.62 ( 53.68 )	4.6 ( 3.16 )	2.2 ( 1.56 )
BILE DUCT STENOSIS	19	16.34 ( 10.38 - 25.72 )	16.34 ( 268.69 )	16.06 ( 10.99 )	4.01 ( 3.35 )
NORMOCHROMIC NORMOCYTIC ANAEMIA	19	6.2 ( 3.95 - 9.73 )	6.2 ( 82.26 )	6.16 ( 4.22 )	2.62 ( 1.98 )
DUODENITIS	19	6.17 ( 3.93 - 9.7 )	6.17 ( 81.82 )	6.14 ( 4.21 )	2.62 ( 1.97 )
DYSAESTHESIA	19	6.51 ( 4.15 - 10.23 )	6.51 ( 88.01 )	6.47 ( 4.44 )	2.69 ( 2.05 )
OTOTOXICITY	19	10.48 ( 6.67 - 16.48 )	10.48 ( 161.06 )	10.37 ( 7.1 )	3.37 ( 2.73 )
NEOPLASM RECURRENCE	19	5.62 ( 3.58 - 8.82 )	5.62 ( 71.71 )	5.59 ( 3.83 )	2.48 ( 1.84 )
BICYTOPENIA	19	10.98 ( 6.98 - 17.26 )	10.97 ( 170.17 )	10.85 ( 7.43 )	3.44 ( 2.79 )
TRANSITIONAL CELL CARCINOMA	19	16.14 ( 10.25 - 25.41 )	16.14 ( 265.05 )	15.87 ( 10.86 )	3.99 ( 3.34 )
DIFFUSE LARGE B-CELL LYMPHOMA RECURRENT	19	10.54 ( 6.7 - 16.57 )	10.54 ( 162.12 )	10.43 ( 7.14 )	3.38 ( 2.73 )
PROTEIN TOTAL DECREASED	18	4.72 ( 2.97 - 7.51 )	4.72 ( 52.54 )	4.7 ( 3.19 )	2.23 ( 1.57 )
METASTATIC NEOPLASM	18	4.28 ( 2.69 - 6.8 )	4.28 ( 44.98 )	4.26 ( 2.89 )	2.09 ( 1.43 )
GRAVITATIONAL OEDEMA	17	23.6 ( 14.58 - 38.2 )	23.59 ( 358.44 )	23.02 ( 15.38 )	4.52 ( 3.84 )
MUSCLE NECROSIS	17	19.02 ( 11.77 - 30.76 )	19.02 ( 284.25 )	18.65 ( 12.48 )	4.22 ( 3.53 )
PORTAL HYPERTENSION	17	5.62 ( 3.49 - 9.05 )	5.61 ( 64.07 )	5.59 ( 3.75 )	2.48 ( 1.8 )
FIBRIN D DIMER INCREASED	17	4.75 ( 2.95 - 7.66 )	4.75 ( 50.12 )	4.73 ( 3.18 )	2.24 ( 1.56 )
RECURRENT CANCER	17	4.37 ( 2.71 - 7.03 )	4.37 ( 43.9 )	4.35 ( 2.92 )	2.12 ( 1.44 )
SPLENIC INFARCTION	17	9.9 ( 6.14 - 15.97 )	9.9 ( 134.56 )	9.8 ( 6.57 )	3.29 ( 2.61 )
STAPHYLOCOCCAL BACTERAEMIA	17	4.11 ( 2.55 - 6.62 )	4.11 ( 39.81 )	4.1 ( 2.75 )	2.03 ( 1.35 )
HYPOPROTEINAEMIA	17	9.24 ( 5.73 - 14.91 )	9.24 ( 123.68 )	9.16 ( 6.14 )	3.2 ( 2.51 )
DIFFUSE ALVEOLAR DAMAGE	17	14.48 ( 8.97 - 23.39 )	14.48 ( 209.96 )	14.27 ( 9.55 )	3.83 ( 3.15 )
BILIARY DILATATION	17	11.86 ( 7.35 - 19.14 )	11.86 ( 166.86 )	11.72 ( 7.85 )	3.55 ( 2.87 )
SMALL INTESTINAL HAEMORRHAGE	16	7.96 ( 4.86 - 13.01 )	7.95 ( 96.42 )	7.89 ( 5.23 )	2.98 ( 2.28 )
METASTASES TO SPINE	16	5.01 ( 3.07 - 8.19 )	5.01 ( 51.07 )	4.99 ( 3.31 )	2.32 ( 1.62 )
LARYNGOSPASM	16	5.81 ( 3.56 - 9.5 )	5.81 ( 63.33 )	5.78 ( 3.83 )	2.53 ( 1.83 )
LEUKOENCEPHALOPATHY	16	4.22 ( 2.58 - 6.89 )	4.22 ( 39.09 )	4.2 ( 2.79 )	2.07 ( 1.37 )
ENTEROCOLITIS INFECTIOUS	16	16.69 ( 10.18 - 27.37 )	16.68 ( 231.65 )	16.4 ( 10.84 )	4.04 ( 3.33 )
PARANEOPLASTIC SYNDROME	16	23.89 ( 14.54 - 39.25 )	23.89 ( 341.84 )	23.3 ( 15.38 )	4.54 ( 3.83 )
STAPHYLOCOCCAL SEPSIS	16	3.13 ( 1.92 - 5.11 )	3.13 ( 23.11 )	3.12 ( 2.07 )	1.64 ( 0.94 )
METASTASES TO SKIN	15	15.7 ( 9.42 - 26.16 )	15.7 ( 202.88 )	15.45 ( 10.08 )	3.95 ( 3.22 )
ILEUS PARALYTIC	15	3.46 ( 2.08 - 5.75 )	3.46 ( 26.16 )	3.45 ( 2.26 )	1.79 ( 1.06 )
ORTHOPNOEA	15	4.59 ( 2.76 - 7.62 )	4.59 ( 41.85 )	4.57 ( 2.99 )	2.19 ( 1.47 )
MICROANGIOPATHY	15	16.07 ( 9.64 - 26.78 )	16.07 ( 208.25 )	15.8 ( 10.31 )	3.98 ( 3.25 )
METASTASES TO MENINGES	15	7.18 ( 4.32 - 11.93 )	7.18 ( 79.12 )	7.13 ( 4.66 )	2.83 ( 2.11 )
MIXED LIVER INJURY	15	6.2 ( 3.73 - 10.3 )	6.2 ( 64.95 )	6.16 ( 4.03 )	2.62 ( 1.9 )
IMMUNE-MEDIATED HEPATITIS	15	10.03 ( 6.03 - 16.68 )	10.02 ( 120.53 )	9.93 ( 6.48 )	3.31 ( 2.59 )
NEUTROPENIC INFECTION	15	15.19 ( 9.12 - 25.31 )	15.19 ( 195.52 )	14.95 ( 9.76 )	3.9 ( 3.17 )
LOCALISED OEDEMA	15	3.21 ( 1.93 - 5.33 )	3.21 ( 22.74 )	3.2 ( 2.09 )	1.68 ( 0.96 )
COMPUTERISED TOMOGRAM ABNORMAL	15	6.31 ( 3.8 - 10.48 )	6.31 ( 66.53 )	6.27 ( 4.1 )	2.65 ( 1.92 )
TUMOUR HAEMORRHAGE	14	5.05 ( 2.99 - 8.54 )	5.05 ( 45.23 )	5.03 ( 3.24 )	2.33 ( 1.58 )
OESOPHAGEAL VARICES HAEMORRHAGE	14	6.51 ( 3.85 - 11.01 )	6.51 ( 64.77 )	6.47 ( 4.17 )	2.69 ( 1.95 )
SUBILEUS	14	6.52 ( 3.85 - 11.03 )	6.52 ( 64.95 )	6.48 ( 4.17 )	2.7 ( 1.95 )
SMALL INTESTINAL PERFORATION	14	7.75 ( 4.58 - 13.11 )	7.75 ( 81.54 )	7.69 ( 4.95 )	2.94 ( 2.19 )
LUNG CONSOLIDATION	14	5.05 ( 2.99 - 8.55 )	5.05 ( 45.25 )	5.03 ( 3.24 )	2.33 ( 1.58 )
PSEUDOCIRRHOSIS	14	50.16 ( 29.28 - 85.91 )	50.14 ( 638.94 )	47.57 ( 30.32 )	5.57 ( 4.81 )
BILIARY SEPSIS	14	30.07 ( 17.65 - 51.21 )	30.06 ( 380.72 )	29.13 ( 18.66 )	4.86 ( 4.11 )
CHEST X-RAY ABNORMAL	14	4.26 ( 2.52 - 7.2 )	4.26 ( 34.73 )	4.24 ( 2.73 )	2.08 ( 1.34 )
AZOTAEMIA	14	3.61 ( 2.13 - 6.1 )	3.61 ( 26.27 )	3.6 ( 2.32 )	1.85 ( 1.1 )
TOXIC ERYTHEMA OF CHEMOTHERAPY	14	72.51 ( 42.07 - 124.98 )	72.49 ( 913.99 )	67.2 ( 42.61 )	6.07 ( 5.3 )
RED BLOOD CELL SCHISTOCYTES PRESENT	14	43.61 ( 25.5 - 74.56 )	43.6 ( 555.92 )	41.64 ( 26.58 )	5.38 ( 4.62 )
DRUG TOLERANCE DECREASED	13	5.13 ( 2.98 - 8.86 )	5.13 ( 43.02 )	5.11 ( 3.24 )	2.35 ( 1.58 )
DUODENITIS HAEMORRHAGIC	13	96.58 ( 54.52 - 171.1 )	96.56 ( 1111.03 )	87.36 ( 54.14 )	6.45 ( 5.64 )
DRY GANGRENE	13	20.28 ( 11.7 - 35.14 )	20.28 ( 233.02 )	19.85 ( 12.53 )	4.31 ( 3.53 )
BILIARY TRACT DISORDER	13	9.66 ( 5.59 - 16.68 )	9.66 ( 99.81 )	9.56 ( 6.05 )	3.26 ( 2.48 )
BLOOD CULTURE POSITIVE	13	4.05 ( 2.35 - 6.99 )	4.05 ( 29.76 )	4.04 ( 2.56 )	2.01 ( 1.24 )
HEPATORENAL SYNDROME	13	7.52 ( 4.36 - 12.98 )	7.52 ( 72.86 )	7.46 ( 4.73 )	2.9 ( 2.13 )
LARGE INTESTINAL OBSTRUCTION	13	6.23 ( 3.61 - 10.76 )	6.23 ( 56.73 )	6.2 ( 3.93 )	2.63 ( 1.86 )
GASTROENTERITIS RADIATION	13	39.81 ( 22.84 - 69.37 )	39.8 ( 471.02 )	38.17 ( 23.98 )	5.25 ( 4.47 )
ESCHERICHIA SEPSIS	13	4.45 ( 2.58 - 7.67 )	4.45 ( 34.59 )	4.43 ( 2.81 )	2.15 ( 1.37 )
HODGKIN'S DISEASE	13	3.37 ( 1.95 - 5.8 )	3.37 ( 21.54 )	3.36 ( 2.13 )	1.75 ( 0.97 )
PANCREATIC MASS	13	12.81 ( 7.41 - 22.14 )	12.8 ( 139.51 )	12.64 ( 7.99 )	3.66 ( 2.88 )
GRANULOCYTE COUNT DECREASED	13	8.58 ( 4.97 - 14.82 )	8.58 ( 86.24 )	8.51 ( 5.39 )	3.09 ( 2.31 )
PO2 DECREASED	13	10.6 ( 6.13 - 18.31 )	10.59 ( 111.64 )	10.48 ( 6.63 )	3.39 ( 2.61 )
VENA CAVA THROMBOSIS	12	7.16 ( 4.06 - 12.64 )	7.16 ( 63.08 )	7.11 ( 4.42 )	2.83 ( 2.03 )
TUMOUR INVASION	12	26.08 ( 14.69 - 46.3 )	26.08 ( 281.29 )	25.38 ( 15.7 )	4.67 ( 3.85 )
ADENOCARCINOMA	12	5.21 ( 2.95 - 9.19 )	5.21 ( 40.57 )	5.18 ( 3.22 )	2.37 ( 1.57 )
URINARY TRACT OBSTRUCTION	12	5.08 ( 2.88 - 8.96 )	5.08 ( 39.12 )	5.06 ( 3.15 )	2.34 ( 1.54 )
ESCHERICHIA BACTERAEMIA	12	5.52 ( 3.13 - 9.73 )	5.52 ( 44.11 )	5.49 ( 3.41 )	2.46 ( 1.65 )
HEPATIC FIBROSIS	12	3.66 ( 2.08 - 6.45 )	3.66 ( 23.09 )	3.65 ( 2.27 )	1.87 ( 1.07 )
RENAL TUBULAR DISORDER	12	4.11 ( 2.33 - 7.24 )	4.1 ( 28.06 )	4.09 ( 2.55 )	2.03 ( 1.23 )
CARCINOEMBRYONIC ANTIGEN INCREASED	12	6.34 ( 3.59 - 11.18 )	6.34 ( 53.56 )	6.3 ( 3.92 )	2.66 ( 1.85 )
GASTROINTESTINAL ULCER	11	4.93 ( 2.73 - 8.92 )	4.93 ( 34.3 )	4.91 ( 2.99 )	2.3 ( 1.46 )
ABDOMINAL INFECTION	11	4.42 ( 2.44 - 7.99 )	4.42 ( 28.95 )	4.4 ( 2.68 )	2.14 ( 1.3 )
NEUTROPENIC COLITIS	11	5.78 ( 3.19 - 10.45 )	5.78 ( 43.16 )	5.74 ( 3.5 )	2.52 ( 1.69 )
CANCER PAIN	11	4.45 ( 2.46 - 8.05 )	4.45 ( 29.28 )	4.43 ( 2.7 )	2.15 ( 1.31 )
PANCREATIC CARCINOMA RECURRENT	11	54.78 ( 29.81 - 100.68 )	54.77 ( 547.57 )	51.7 ( 31.07 )	5.69 ( 4.83 )
TUMOUR NECROSIS	11	10.54 ( 5.82 - 19.1 )	10.54 ( 93.86 )	10.43 ( 6.34 )	3.38 ( 2.54 )
NECROSIS ISCHAEMIC	11	24.14 ( 13.26 - 43.93 )	24.14 ( 237.62 )	23.54 ( 14.26 )	4.56 ( 3.71 )
PERIPHERAL ARTERY THROMBOSIS	11	7.72 ( 4.26 - 13.97 )	7.72 ( 63.75 )	7.66 ( 4.66 )	2.94 ( 2.1 )
GASTRIC PERFORATION	11	4.22 ( 2.33 - 7.62 )	4.21 ( 26.85 )	4.2 ( 2.56 )	2.07 ( 1.24 )
VENOUS THROMBOSIS LIMB	11	4.85 ( 2.68 - 8.78 )	4.85 ( 33.47 )	4.83 ( 2.94 )	2.27 ( 1.44 )
HAPTOGLOBIN DECREASED	11	14.34 ( 7.91 - 26.03 )	14.34 ( 134.41 )	14.13 ( 8.59 )	3.82 ( 2.98 )
LUNG ADENOCARCINOMA	11	3.7 ( 2.04 - 6.68 )	3.69 ( 21.53 )	3.68 ( 2.24 )	1.88 ( 1.05 )
RADIATION INJURY	11	10.62 ( 5.86 - 19.24 )	10.62 ( 94.7 )	10.5 ( 6.39 )	3.39 ( 2.55 )
MALIGNANT HYPERTENSION	11	12.42 ( 6.85 - 22.51 )	12.41 ( 113.88 )	12.26 ( 7.45 )	3.62 ( 2.78 )
PULMONARY VENO-OCCLUSIVE DISEASE	11	15.88 ( 8.75 - 28.82 )	15.87 ( 150.65 )	15.62 ( 9.48 )	3.96 ( 3.12 )
PNEUMONIA KLEBSIELLA	11	6.14 ( 3.39 - 11.1 )	6.13 ( 46.95 )	6.1 ( 3.71 )	2.61 ( 1.77 )
PNEUMONIA VIRAL	11	3.58 ( 1.98 - 6.47 )	3.58 ( 20.34 )	3.57 ( 2.17 )	1.83 ( 1 )
NEUTROPHIL COUNT ABNORMAL	11	4.02 ( 2.22 - 7.27 )	4.02 ( 24.82 )	4 ( 2.44 )	2 ( 1.17 )
PLATELET TOXICITY	11	138.47 ( 73.41 - 261.18 )	138.44 ( 1302.04 )	120.23 ( 70.7 )	6.91 ( 6.02 )
PROSTATITIS	11	3.57 ( 1.98 - 6.46 )	3.57 ( 20.29 )	3.56 ( 2.17 )	1.83 ( 1 )
GLOMERULONEPHRITIS	10	4.22 ( 2.27 - 7.86 )	4.22 ( 24.48 )	4.21 ( 2.5 )	2.07 ( 1.2 )
CHOLANGIOCARCINOMA	10	7.16 ( 3.85 - 13.35 )	7.16 ( 52.62 )	7.12 ( 4.23 )	2.83 ( 1.96 )
SUBCLAVIAN VEIN THROMBOSIS	10	8.58 ( 4.6 - 16 )	8.58 ( 66.35 )	8.51 ( 5.05 )	3.09 ( 2.21 )
OESOPHAGEAL STENOSIS	10	3.57 ( 1.92 - 6.65 )	3.57 ( 18.46 )	3.56 ( 2.12 )	1.83 ( 0.96 )
RADIATION SKIN INJURY	10	8.5 ( 4.56 - 15.85 )	8.5 ( 65.57 )	8.43 ( 5.01 )	3.08 ( 2.2 )
HISTOPLASMOSIS DISSEMINATED	10	7.24 ( 3.89 - 13.5 )	7.24 ( 53.39 )	7.19 ( 4.27 )	2.85 ( 1.97 )
SYSTOLIC DYSFUNCTION	10	9.64 ( 5.17 - 17.98 )	9.64 ( 76.63 )	9.55 ( 5.67 )	3.26 ( 2.38 )
OVARIAN CANCER RECURRENT	10	6.79 ( 3.64 - 12.65 )	6.79 ( 48.99 )	6.74 ( 4.01 )	2.75 ( 1.88 )
CEREBELLAR SYNDROME	10	4.47 ( 2.4 - 8.33 )	4.47 ( 26.83 )	4.46 ( 2.65 )	2.16 ( 1.28 )
HYPERAMMONAEMIC ENCEPHALOPATHY	10	5.95 ( 3.2 - 11.08 )	5.95 ( 40.91 )	5.92 ( 3.52 )	2.57 ( 1.69 )
CARDIAC DEATH	10	8.18 ( 4.39 - 15.25 )	8.18 ( 62.45 )	8.11 ( 4.82 )	3.02 ( 2.15 )
BILE DUCT CANCER	10	8.17 ( 4.38 - 15.23 )	8.17 ( 62.37 )	8.11 ( 4.82 )	3.02 ( 2.14 )
HYPERPHOSPHATAEMIA	10	5.12 ( 2.75 - 9.53 )	5.12 ( 32.94 )	5.09 ( 3.03 )	2.35 ( 1.48 )
PSYCHOMOTOR SKILLS IMPAIRED	10	3.72 ( 2 - 6.93 )	3.72 ( 19.82 )	3.71 ( 2.21 )	1.89 ( 1.02 )
PULMONARY INFARCTION	10	4.02 ( 2.16 - 7.47 )	4.01 ( 22.54 )	4 ( 2.38 )	2 ( 1.13 )
BLOOD PH INCREASED	10	17.2 ( 9.2 - 32.15 )	17.2 ( 149.69 )	16.89 ( 10.01 )	4.08 ( 3.2 )
LYMPHANGITIS	10	12.48 ( 6.69 - 23.3 )	12.48 ( 104.19 )	12.33 ( 7.31 )	3.62 ( 2.75 )
ARTERITIS	9	14.49 ( 7.5 - 27.99 )	14.49 ( 111.22 )	14.27 ( 8.23 )	3.84 ( 2.91 )
CHOLANGITIS INFECTIVE	9	38.84 ( 19.93 - 75.7 )	38.84 ( 318.12 )	37.28 ( 21.33 )	5.22 ( 4.29 )
ANASTOMOTIC ULCER	9	22.29 ( 11.5 - 43.18 )	22.28 ( 178.56 )	21.77 ( 12.52 )	4.44 ( 3.52 )
ACUTE INTERSTITIAL PNEUMONITIS	9	17.77 ( 9.19 - 34.37 )	17.77 ( 139.68 )	17.45 ( 10.04 )	4.12 ( 3.2 )
ERYSIPELOID	9	254.9 ( 121.67 - 534.02 )	254.86 ( 1776.23 )	199.14 ( 107.25 )	7.64 ( 6.62 )
OBSTRUCTION GASTRIC	9	7.5 ( 3.89 - 14.45 )	7.5 ( 50.25 )	7.44 ( 4.3 )	2.9 ( 1.98 )
SARCOMA	9	7.9 ( 4.1 - 15.22 )	7.9 ( 53.73 )	7.84 ( 4.52 )	2.97 ( 2.05 )
EASTERN COOPERATIVE ONCOLOGY GROUP PERFORMANCE STATUS WORSENED	9	7.73 ( 4.01 - 14.9 )	7.73 ( 52.29 )	7.67 ( 4.43 )	2.94 ( 2.02 )
DERMATOMYOSITIS	9	3.67 ( 1.91 - 7.06 )	3.67 ( 17.4 )	3.66 ( 2.12 )	1.87 ( 0.96 )
PANCREATIC FISTULA	9	70.93 ( 35.99 - 139.79 )	70.92 ( 575.36 )	65.84 ( 37.32 )	6.04 ( 5.09 )
HEPATIC INFECTION	9	7.34 ( 3.81 - 14.15 )	7.34 ( 48.9 )	7.29 ( 4.21 )	2.87 ( 1.95 )
PANNICULITIS	9	3.78 ( 1.96 - 7.27 )	3.78 ( 18.3 )	3.77 ( 2.18 )	1.91 ( 1 )
CHOROIDAL EFFUSION	9	12.63 ( 6.54 - 24.38 )	12.62 ( 95.01 )	12.47 ( 7.19 )	3.64 ( 2.72 )
LEIOMYOSARCOMA	9	23.78 ( 12.27 - 46.1 )	23.78 ( 191.35 )	23.19 ( 13.33 )	4.54 ( 3.61 )
VASCULAR PAIN	9	9.65 ( 5 - 18.62 )	9.65 ( 69.06 )	9.56 ( 5.52 )	3.26 ( 2.34 )
STEATOHEPATITIS	9	17.06 ( 8.82 - 33 )	17.06 ( 133.57 )	16.77 ( 9.65 )	4.07 ( 3.15 )
MESENTERIC VEIN THROMBOSIS	9	9.12 ( 4.73 - 17.59 )	9.12 ( 64.44 )	9.04 ( 5.22 )	3.18 ( 2.26 )
ARTERIAL THROMBOSIS	9	4.58 ( 2.38 - 8.83 )	4.58 ( 25.1 )	4.57 ( 2.64 )	2.19 ( 1.28 )
CUTANEOUS LUPUS ERYTHEMATOSUS	9	4.54 ( 2.36 - 8.73 )	4.54 ( 24.68 )	4.52 ( 2.61 )	2.18 ( 1.26 )
NON-RENAL CELL CARCINOMA OF KIDNEY	9	582.63 ( 252.17 - 1346.14 )	582.54 ( 3180.37 )	354.98 ( 176.15 )	8.47 ( 7.39 )
AMAUROSIS	9	11.67 ( 6.05 - 22.52 )	11.67 ( 86.66 )	11.53 ( 6.65 )	3.53 ( 2.61 )
VASCULAR PURPURA	9	6.53 ( 3.39 - 12.58 )	6.53 ( 41.85 )	6.49 ( 3.75 )	2.7 ( 1.78 )
RENAL-LIMITED THROMBOTIC MICROANGIOPATHY	9	66.86 ( 33.97 - 131.58 )	66.85 ( 543.67 )	62.33 ( 35.37 )	5.96 ( 5.02 )
ESCHERICHIA TEST POSITIVE	8	6.67 ( 3.33 - 13.37 )	6.67 ( 38.27 )	6.63 ( 3.7 )	2.73 ( 1.76 )
RETINAL ISCHAEMIA	8	13.65 ( 6.79 - 27.45 )	13.65 ( 92.41 )	13.46 ( 7.51 )	3.75 ( 2.78 )
PERICARDITIS CONSTRICTIVE	8	20.95 ( 10.4 - 42.24 )	20.95 ( 148.56 )	20.5 ( 11.4 )	4.36 ( 3.38 )
EOSINOPHIL COUNT DECREASED	8	4.07 ( 2.03 - 8.15 )	4.07 ( 18.43 )	4.05 ( 2.27 )	2.02 ( 1.06 )
METASTASES TO PLEURA	8	8.46 ( 4.22 - 16.97 )	8.46 ( 52.13 )	8.39 ( 4.69 )	3.07 ( 2.1 )
EMPYEMA	8	4.03 ( 2.01 - 8.07 )	4.03 ( 18.13 )	4.01 ( 2.24 )	2.01 ( 1.04 )
HYPERTENSIVE EMERGENCY	8	7.05 ( 3.51 - 14.13 )	7.05 ( 41.18 )	7 ( 3.91 )	2.81 ( 1.84 )
ECTROPION	8	24.01 ( 11.9 - 48.45 )	24 ( 171.82 )	23.41 ( 13.01 )	4.55 ( 3.57 )
RENAL INFARCT	8	5.52 ( 2.75 - 11.06 )	5.52 ( 29.41 )	5.49 ( 3.07 )	2.46 ( 1.49 )
VASCULAR PSEUDOANEURYSM	8	4.67 ( 2.33 - 9.36 )	4.67 ( 22.96 )	4.65 ( 2.6 )	2.22 ( 1.25 )
PULMONARY ARTERY THROMBOSIS	8	10.4 ( 5.18 - 20.88 )	10.4 ( 67.21 )	10.29 ( 5.75 )	3.36 ( 2.4 )
DUODENAL STENOSIS	8	17.51 ( 8.7 - 35.26 )	17.51 ( 122.18 )	17.2 ( 9.58 )	4.1 ( 3.13 )
PURTSCHER RETINOPATHY	8	129.47 ( 61.72 - 271.59 )	129.45 ( 892.23 )	113.4 ( 61.01 )	6.83 ( 5.8 )
SCLERODERMA-LIKE REACTION	8	59.43 ( 29.06 - 121.53 )	59.42 ( 431.23 )	55.83 ( 30.68 )	5.8 ( 4.81 )
TRACHEO-OESOPHAGEAL FISTULA	8	12.29 ( 6.12 - 24.69 )	12.29 ( 81.84 )	12.14 ( 6.77 )	3.6 ( 2.63 )
ANAEMIA MACROCYTIC	8	3.79 ( 1.89 - 7.59 )	3.79 ( 16.37 )	3.78 ( 2.11 )	1.92 ( 0.95 )
CAUDA EQUINA SYNDROME	8	10.65 ( 5.3 - 21.38 )	10.65 ( 69.1 )	10.53 ( 5.88 )	3.4 ( 2.43 )
MYELITIS	8	5.4 ( 2.7 - 10.83 )	5.4 ( 28.53 )	5.38 ( 3.01 )	2.43 ( 1.46 )
EFFUSION	7	5.03 ( 2.39 - 10.57 )	5.03 ( 22.45 )	5 ( 2.69 )	2.32 ( 1.3 )
JUGULAR VEIN THROMBOSIS	7	4 ( 1.9 - 8.4 )	4 ( 15.66 )	3.98 ( 2.14 )	1.99 ( 0.97 )
HEPATIC CANCER METASTATIC	7	8 ( 3.8 - 16.84 )	8 ( 42.49 )	7.94 ( 4.26 )	2.99 ( 1.96 )
NECROTISING COLITIS	7	5.48 ( 2.61 - 11.53 )	5.48 ( 25.5 )	5.46 ( 2.93 )	2.45 ( 1.42 )
HEPATIC ATROPHY	7	15.59 ( 7.38 - 32.91 )	15.59 ( 93.93 )	15.34 ( 8.21 )	3.94 ( 2.91 )
PNEUMOMEDIASTINUM	7	4.22 ( 2.01 - 8.86 )	4.22 ( 17.1 )	4.2 ( 2.26 )	2.07 ( 1.05 )
INJECTION SITE PHLEBITIS	7	28.71 ( 13.53 - 60.92 )	28.7 ( 181.42 )	27.85 ( 14.84 )	4.8 ( 3.76 )
ENTEROCOCCUS TEST POSITIVE	7	10.83 ( 5.14 - 22.81 )	10.82 ( 61.68 )	10.71 ( 5.74 )	3.42 ( 2.39 )
PERFORATION BILE DUCT	7	79.3 ( 36.62 - 171.71 )	79.29 ( 497.58 )	72.99 ( 38.24 )	6.19 ( 5.12 )
ECZEMA ASTEATOTIC	7	15.94 ( 7.55 - 33.65 )	15.94 ( 96.31 )	15.68 ( 8.39 )	3.97 ( 2.94 )
BRAIN TERATOMA	7	906.28 ( 317.87 - 2583.88 )	906.18 ( 3164.62 )	453.59 ( 188.77 )	8.83 ( 7.56 )
THROMBOCYTOPENIC PURPURA	7	4.97 ( 2.37 - 10.45 )	4.97 ( 22.09 )	4.95 ( 2.66 )	2.31 ( 1.28 )
ADMINISTRATION SITE EXTRAVASATION	7	7.8 ( 3.71 - 16.42 )	7.8 ( 41.16 )	7.74 ( 4.16 )	2.95 ( 1.93 )
KIDNEY FIBROSIS	7	3.99 ( 1.9 - 8.39 )	3.99 ( 15.63 )	3.98 ( 2.14 )	1.99 ( 0.97 )
PERIPHERAL ARTERY OCCLUSION	7	5.09 ( 2.42 - 10.69 )	5.09 ( 22.86 )	5.06 ( 2.72 )	2.34 ( 1.32 )
STENOTROPHOMONAS INFECTION	7	5.56 ( 2.64 - 11.68 )	5.55 ( 25.98 )	5.53 ( 2.97 )	2.47 ( 1.44 )
FEBRILE INFECTION	7	6.35 ( 3.02 - 13.36 )	6.35 ( 31.33 )	6.31 ( 3.39 )	2.66 ( 1.63 )
ENTEROCUTANEOUS FISTULA	7	8.02 ( 3.81 - 16.88 )	8.02 ( 42.63 )	7.96 ( 4.27 )	2.99 ( 1.97 )
SUBRETINAL FLUID	7	7.63 ( 3.63 - 16.06 )	7.63 ( 40.01 )	7.58 ( 4.07 )	2.92 ( 1.9 )
PSEUDOMONAL SEPSIS	7	4.05 ( 1.93 - 8.5 )	4.05 ( 15.98 )	4.03 ( 2.17 )	2.01 ( 0.99 )
CARDIAC FIBRILLATION	7	4.72 ( 2.25 - 9.92 )	4.72 ( 20.42 )	4.7 ( 2.52 )	2.23 ( 1.21 )
EJECTION FRACTION	7	11.33 ( 5.38 - 23.87 )	11.33 ( 65.1 )	11.2 ( 6 )	3.49 ( 2.46 )
CAPILLARY PERMEABILITY INCREASED	7	126.88 ( 57.53 - 279.85 )	126.86 ( 766.76 )	111.41 ( 57.47 )	6.8 ( 5.71 )
ISCHAEMIC HEPATITIS	7	5.31 ( 2.53 - 11.16 )	5.31 ( 24.33 )	5.28 ( 2.84 )	2.4 ( 1.38 )
COMA HEPATIC	7	8.62 ( 4.09 - 18.14 )	8.62 ( 46.7 )	8.55 ( 4.58 )	3.1 ( 2.07 )
CULTURE URINE POSITIVE	7	4.68 ( 2.23 - 9.84 )	4.68 ( 20.16 )	4.66 ( 2.5 )	2.22 ( 1.2 )
RETINAL EXUDATES	6	6.29 ( 2.82 - 14.03 )	6.29 ( 26.48 )	6.25 ( 3.19 )	2.64 ( 1.55 )
PERIPHERAL MOTOR NEUROPATHY	6	4.31 ( 1.93 - 9.61 )	4.31 ( 15.17 )	4.29 ( 2.19 )	2.1 ( 1.01 )
RECTAL TENESMUS	6	5.36 ( 2.4 - 11.95 )	5.36 ( 21.14 )	5.33 ( 2.72 )	2.41 ( 1.32 )
TRACHEAL INJURY	6	42.15 ( 18.59 - 95.57 )	42.15 ( 230.32 )	40.32 ( 20.33 )	5.33 ( 4.22 )
EMBOLISM ARTERIAL	6	4.96 ( 2.22 - 11.06 )	4.96 ( 18.85 )	4.93 ( 2.52 )	2.3 ( 1.21 )
OVARIAN VEIN THROMBOSIS	6	42.82 ( 18.88 - 97.11 )	42.81 ( 233.96 )	40.93 ( 20.63 )	5.35 ( 4.24 )
AXONAL NEUROPATHY	6	7.33 ( 3.28 - 16.37 )	7.33 ( 32.52 )	7.28 ( 3.72 )	2.86 ( 1.77 )
BLOOD FIBRINOGEN INCREASED	6	7.13 ( 3.19 - 15.91 )	7.13 ( 31.35 )	7.08 ( 3.61 )	2.82 ( 1.73 )
KLEBSIELLA BACTERAEMIA	6	7.11 ( 3.18 - 15.87 )	7.11 ( 31.24 )	7.06 ( 3.6 )	2.82 ( 1.72 )
FISTULA OF SMALL INTESTINE	6	16.73 ( 7.46 - 37.52 )	16.73 ( 87.13 )	16.44 ( 8.37 )	4.04 ( 2.94 )
GOUTY ARTHRITIS	6	7.29 ( 3.26 - 16.28 )	7.29 ( 32.29 )	7.24 ( 3.7 )	2.86 ( 1.76 )
VASOSPASM	6	6.61 ( 2.96 - 14.77 )	6.61 ( 28.39 )	6.57 ( 3.36 )	2.72 ( 1.62 )
TELANGIECTASIA	6	6.68 ( 2.99 - 14.91 )	6.68 ( 28.76 )	6.64 ( 3.39 )	2.73 ( 1.64 )
ATHETOSIS	6	33.36 ( 14.77 - 75.35 )	33.36 ( 181.63 )	32.21 ( 16.29 )	5.01 ( 3.9 )
CARBON DIOXIDE DECREASED	6	5.43 ( 2.43 - 12.11 )	5.43 ( 21.53 )	5.4 ( 2.76 )	2.43 ( 1.34 )
METASTASES TO BONE MARROW	6	12.19 ( 5.45 - 27.29 )	12.19 ( 60.82 )	12.04 ( 6.14 )	3.59 ( 2.49 )
PROCALCITONIN INCREASED	6	5.62 ( 2.52 - 12.54 )	5.62 ( 22.63 )	5.59 ( 2.85 )	2.48 ( 1.39 )
PRINZMETAL ANGINA	6	6.06 ( 2.72 - 13.53 )	6.06 ( 25.19 )	6.03 ( 3.08 )	2.59 ( 1.5 )
PLATELET TRANSFUSION	6	4.93 ( 2.21 - 11 )	4.93 ( 18.69 )	4.91 ( 2.51 )	2.3 ( 1.2 )
SENSE OF OPPRESSION	6	4.99 ( 2.24 - 11.13 )	4.99 ( 19.03 )	4.97 ( 2.54 )	2.31 ( 1.22 )
PERIPHERAL EMBOLISM	6	4.85 ( 2.17 - 10.82 )	4.85 ( 18.24 )	4.83 ( 2.47 )	2.27 ( 1.18 )
BILIARY OBSTRUCTION	6	6.37 ( 2.86 - 14.23 )	6.37 ( 27 )	6.34 ( 3.24 )	2.66 ( 1.57 )
MUCOSAL HAEMORRHAGE	6	5.2 ( 2.33 - 11.61 )	5.2 ( 20.25 )	5.18 ( 2.65 )	2.37 ( 1.28 )
INTERTRIGO	6	12.16 ( 5.44 - 27.22 )	12.16 ( 60.66 )	12.02 ( 6.12 )	3.59 ( 2.49 )
IIIRD NERVE PARALYSIS	6	8.03 ( 3.6 - 17.94 )	8.03 ( 36.61 )	7.97 ( 4.07 )	2.99 ( 1.9 )
SPUTUM CULTURE POSITIVE	6	6.74 ( 3.02 - 15.04 )	6.74 ( 29.1 )	6.7 ( 3.42 )	2.74 ( 1.65 )
AXILLARY VEIN THROMBOSIS	5	13.81 ( 5.71 - 33.41 )	13.81 ( 58.54 )	13.62 ( 6.51 )	3.77 ( 2.58 )
LYMPHOCELE	5	7.16 ( 2.97 - 17.26 )	7.16 ( 26.28 )	7.11 ( 3.4 )	2.83 ( 1.65 )
MUSCLE OEDEMA	5	24.36 ( 10.02 - 59.22 )	24.36 ( 109.07 )	23.75 ( 11.29 )	4.57 ( 3.37 )
SEPTIC EMBOLUS	5	5.92 ( 2.46 - 14.25 )	5.91 ( 20.29 )	5.88 ( 2.82 )	2.56 ( 1.37 )
METASTASES TO PELVIS	5	8.21 ( 3.4 - 19.8 )	8.21 ( 31.37 )	8.14 ( 3.9 )	3.03 ( 1.84 )
BLOOD ALBUMIN INCREASED	5	5.59 ( 2.32 - 13.48 )	5.59 ( 18.75 )	5.57 ( 2.67 )	2.48 ( 1.29 )
HEPATIC ARTERY OCCLUSION	5	62.93 ( 25.42 - 155.8 )	62.93 ( 284.94 )	58.91 ( 27.59 )	5.88 ( 4.66 )
SYSTEMIC LUPUS ERYTHEMATOSUS RASH	5	6.1 ( 2.53 - 14.7 )	6.1 ( 21.17 )	6.06 ( 2.91 )	2.6 ( 1.42 )
BRONCHIAL FISTULA	5	25.46 ( 10.47 - 61.92 )	25.45 ( 114.26 )	24.79 ( 11.78 )	4.63 ( 3.43 )
TRANSIENT GLOBAL AMNESIA	5	6.93 ( 2.87 - 16.7 )	6.93 ( 25.17 )	6.88 ( 3.3 )	2.78 ( 1.6 )
ENTEROCOCCAL BACTERAEMIA	5	4.97 ( 2.06 - 11.97 )	4.97 ( 15.76 )	4.95 ( 2.37 )	2.31 ( 1.12 )
PORTAL HYPERTENSIVE GASTROPATHY	5	9.52 ( 3.94 - 22.98 )	9.52 ( 37.72 )	9.43 ( 4.51 )	3.24 ( 2.05 )
RETINAL PIGMENT EPITHELIOPATHY	5	11.13 ( 4.61 - 26.89 )	11.13 ( 45.55 )	11.01 ( 5.26 )	3.46 ( 2.27 )
PNEUMONIA RESPIRATORY SYNCYTIAL VIRAL	5	6.62 ( 2.75 - 15.97 )	6.62 ( 23.7 )	6.58 ( 3.15 )	2.72 ( 1.54 )
VASCULITIS NECROTISING	5	6.72 ( 2.79 - 16.21 )	6.72 ( 24.18 )	6.68 ( 3.2 )	2.74 ( 1.56 )
HYPERCALCAEMIA OF MALIGNANCY	5	20.88 ( 8.6 - 50.68 )	20.88 ( 92.51 )	20.43 ( 9.73 )	4.35 ( 3.16 )
INFUSION SITE THROMBOSIS	5	20.14 ( 8.3 - 48.86 )	20.14 ( 88.96 )	19.72 ( 9.39 )	4.3 ( 3.11 )
OESOPHAGEAL FISTULA	5	16.07 ( 6.64 - 38.91 )	16.07 ( 69.42 )	15.8 ( 7.54 )	3.98 ( 2.79 )
GASTROINTESTINAL EROSION	5	7.83 ( 3.24 - 18.87 )	7.83 ( 29.51 )	7.77 ( 3.72 )	2.96 ( 1.77 )
PLEURAL INFECTION	5	22.43 ( 9.24 - 54.48 )	22.43 ( 99.9 )	21.91 ( 10.43 )	4.45 ( 3.26 )
VOCAL CORD PARESIS	5	21.78 ( 8.97 - 52.89 )	21.78 ( 96.82 )	21.3 ( 10.14 )	4.41 ( 3.22 )
SCROTAL SWELLING	5	5.33 ( 2.21 - 12.84 )	5.33 ( 17.49 )	5.31 ( 2.54 )	2.41 ( 1.23 )
DUODENAL PERFORATION	5	5.41 ( 2.24 - 13.03 )	5.41 ( 17.85 )	5.38 ( 2.58 )	2.43 ( 1.25 )
PLASMAPHERESIS	5	9.72 ( 4.03 - 23.47 )	9.72 ( 38.71 )	9.63 ( 4.61 )	3.27 ( 2.08 )
PNEUMOCYSTIS JIROVECII INFECTION	5	4.83 ( 2.01 - 11.63 )	4.83 ( 15.11 )	4.81 ( 2.31 )	2.27 ( 1.08 )
VASCULAR PSEUDOANEURYSM RUPTURED	5	31.04 ( 12.73 - 75.69 )	31.03 ( 140.52 )	30.04 ( 14.25 )	4.91 ( 3.71 )
CAROTID ARTERY THROMBOSIS	5	6.43 ( 2.67 - 15.49 )	6.43 ( 22.75 )	6.39 ( 3.06 )	2.68 ( 1.49 )
TUMOUR THROMBOSIS	5	25.75 ( 10.58 - 62.63 )	25.74 ( 115.63 )	25.06 ( 11.91 )	4.65 ( 3.45 )
PARANEOPLASTIC PEMPHIGUS	5	40.1 ( 16.37 - 98.21 )	40.1 ( 182.53 )	38.44 ( 18.17 )	5.26 ( 4.06 )
CARDIAC VENTRICULAR THROMBOSIS	5	4.98 ( 2.07 - 11.99 )	4.98 ( 15.81 )	4.96 ( 2.38 )	2.31 ( 1.13 )
DIFFUSE LARGE B-CELL LYMPHOMA REFRACTORY	5	6.71 ( 2.78 - 16.18 )	6.71 ( 24.13 )	6.67 ( 3.19 )	2.74 ( 1.55 )
CANDIDA SEPSIS	5	5.55 ( 2.3 - 13.38 )	5.55 ( 18.55 )	5.52 ( 2.65 )	2.47 ( 1.28 )
GRANULOCYTE-COLONY STIMULATING FACTOR LEVEL INCREASED	5	647.32 ( 205.44 - 2039.65 )	647.27 ( 1882.04 )	377.99 ( 144.69 )	8.56 ( 7.14 )
OBSTRUCTIVE PANCREATITIS	5	8.99 ( 3.73 - 21.7 )	8.99 ( 35.16 )	8.91 ( 4.26 )	3.16 ( 1.97 )
HYPERTENSIVE URGENCY	5	11.92 ( 4.93 - 28.82 )	11.92 ( 49.39 )	11.78 ( 5.63 )	3.56 ( 2.37 )
FIBRIN DEGRADATION PRODUCTS INCREASED	5	15.68 ( 6.48 - 37.96 )	15.68 ( 67.54 )	15.43 ( 7.36 )	3.95 ( 2.76 )
NEUTROPHIL PERCENTAGE DECREASED	5	9.4 ( 3.89 - 22.69 )	9.4 ( 37.15 )	9.31 ( 4.46 )	3.22 ( 2.03 )
PNEUMOBILIA	5	32.14 ( 13.17 - 78.41 )	32.13 ( 145.66 )	31.07 ( 14.73 )	4.96 ( 3.76 )
LYMPHOCYTE STIMULATION TEST POSITIVE	5	5.51 ( 2.29 - 13.26 )	5.51 ( 18.32 )	5.48 ( 2.62 )	2.45 ( 1.27 )
REFUSAL OF TREATMENT BY RELATIVE	5	10.46 ( 4.33 - 25.27 )	10.46 ( 42.31 )	10.36 ( 4.95 )	3.37 ( 2.19 )
COOMBS NEGATIVE HAEMOLYTIC ANAEMIA	5	26.65 ( 10.95 - 64.87 )	26.65 ( 119.92 )	25.92 ( 12.32 )	4.7 ( 3.5 )
COMPUTERISED TOMOGRAM THORAX ABNORMAL	4	5.42 ( 2.03 - 14.48 )	5.42 ( 14.33 )	5.39 ( 2.37 )	2.43 ( 1.14 )
HILAR LYMPHADENOPATHY	4	4.64 ( 1.74 - 12.4 )	4.64 ( 11.37 )	4.62 ( 2.03 )	2.21 ( 0.91 )
CHEMICAL CYSTITIS	4	129.46 ( 45.41 - 369.11 )	129.45 ( 446.12 )	113.4 ( 47.19 )	6.83 ( 5.44 )
PORTAL VEIN OCCLUSION	4	27.67 ( 10.23 - 74.83 )	27.67 ( 99.78 )	26.88 ( 11.69 )	4.75 ( 3.43 )
BILIARY ABSCESS	4	172.62 ( 59.25 - 502.89 )	172.61 ( 573.25 )	145.15 ( 59.33 )	7.18 ( 5.77 )
FAT NECROSIS	4	6.46 ( 2.42 - 17.28 )	6.46 ( 18.33 )	6.42 ( 2.82 )	2.68 ( 1.39 )
PERITONEAL DISORDER	4	6.09 ( 2.28 - 16.29 )	6.09 ( 16.91 )	6.06 ( 2.66 )	2.6 ( 1.3 )
METASTASES TO HEART	4	13.73 ( 5.12 - 36.86 )	13.73 ( 46.51 )	13.54 ( 5.93 )	3.76 ( 2.46 )
METASTASES TO ABDOMINAL WALL	4	20.95 ( 7.78 - 56.46 )	20.95 ( 74.28 )	20.5 ( 8.94 )	4.36 ( 3.05 )
METASTASES TO MUSCLE	4	25.17 ( 9.32 - 67.99 )	25.17 ( 90.34 )	24.52 ( 10.68 )	4.62 ( 3.3 )
PROTHROMBIN TIME ABNORMAL	4	5.59 ( 2.09 - 14.95 )	5.59 ( 15 )	5.57 ( 2.44 )	2.48 ( 1.18 )
KLEBSIELLA TEST POSITIVE	4	6.13 ( 2.29 - 16.4 )	6.13 ( 17.07 )	6.1 ( 2.68 )	2.61 ( 1.31 )
NAIL TOXICITY	4	15.04 ( 5.6 - 40.4 )	15.04 ( 51.57 )	14.81 ( 6.48 )	3.89 ( 2.59 )
BILIARY FISTULA	4	30.98 ( 11.44 - 83.94 )	30.98 ( 112.21 )	29.99 ( 13.03 )	4.91 ( 3.59 )
INTESTINAL STRANGULATION	4	24.66 ( 9.13 - 66.58 )	24.66 ( 88.39 )	24.03 ( 10.47 )	4.59 ( 3.28 )
PLANTAR ERYTHEMA	4	16.11 ( 5.99 - 43.3 )	16.11 ( 55.7 )	15.85 ( 6.93 )	3.99 ( 2.68 )
VISCERAL VENOUS THROMBOSIS	4	86.31 ( 30.95 - 240.7 )	86.3 ( 307.93 )	78.88 ( 33.44 )	6.3 ( 4.94 )
CHOLANGIECTASIS ACQUIRED	4	402.77 ( 124.03 - 1307.94 )	402.75 ( 1109.76 )	279.13 ( 104.18 )	8.12 ( 6.62 )
TRANSFUSION REACTION	4	4.67 ( 1.75 - 12.46 )	4.67 ( 11.46 )	4.65 ( 2.04 )	2.22 ( 0.92 )
HEPATIC INFARCTION	4	10.1 ( 3.77 - 27.05 )	10.1 ( 32.42 )	10 ( 4.38 )	3.32 ( 2.02 )
HAEMOBILIA	4	9.85 ( 3.68 - 26.39 )	9.85 ( 31.46 )	9.75 ( 4.28 )	3.29 ( 1.99 )
B-CELL LYMPHOMA RECURRENT	4	7.16 ( 2.68 - 19.16 )	7.16 ( 21.05 )	7.12 ( 3.12 )	2.83 ( 1.53 )
SOFT TISSUE NECROSIS	4	5.94 ( 2.22 - 15.88 )	5.94 ( 16.33 )	5.91 ( 2.6 )	2.56 ( 1.27 )
SCROTAL OEDEMA	4	5.55 ( 2.08 - 14.84 )	5.55 ( 14.83 )	5.52 ( 2.43 )	2.47 ( 1.17 )
INTRAVASCULAR HAEMOLYSIS	4	7.12 ( 2.66 - 19.05 )	7.12 ( 20.88 )	7.07 ( 3.11 )	2.82 ( 1.53 )
METASTASES TO SPLEEN	4	9.8 ( 3.66 - 26.24 )	9.8 ( 31.26 )	9.7 ( 4.25 )	3.28 ( 1.98 )
LEUKOCYTURIA	4	4.89 ( 1.83 - 13.07 )	4.89 ( 12.32 )	4.87 ( 2.14 )	2.28 ( 0.99 )
GASTROPLEURAL FISTULA	4	106.62 ( 37.83 - 300.46 )	106.61 ( 374.42 )	95.49 ( 40.13 )	6.58 ( 5.21 )
NECROTISING SCLERITIS	4	26.85 ( 9.93 - 72.59 )	26.85 ( 96.68 )	26.11 ( 11.36 )	4.71 ( 3.39 )
VULVAL CANCER	4	6.69 ( 2.5 - 17.88 )	6.69 ( 19.21 )	6.65 ( 2.92 )	2.73 ( 1.44 )
BRONCHITIS BACTERIAL	4	5.14 ( 1.92 - 13.74 )	5.14 ( 13.27 )	5.12 ( 2.25 )	2.36 ( 1.06 )
NUTRITIONAL CONDITION ABNORMAL	4	5.9 ( 2.21 - 15.78 )	5.9 ( 16.19 )	5.87 ( 2.58 )	2.55 ( 1.26 )
HYPERLIPASAEMIA	4	7.91 ( 2.96 - 21.18 )	7.91 ( 23.95 )	7.85 ( 3.45 )	2.97 ( 1.68 )
MOLLUSCUM CONTAGIOSUM	4	8.13 ( 3.04 - 21.75 )	8.13 ( 24.78 )	8.06 ( 3.54 )	3.01 ( 1.71 )
EROSIVE DUODENITIS	4	4.76 ( 1.78 - 12.72 )	4.76 ( 11.83 )	4.74 ( 2.08 )	2.25 ( 0.95 )
APOPTOSIS	4	12.95 ( 4.82 - 34.74 )	12.95 ( 43.47 )	12.78 ( 5.59 )	3.68 ( 2.37 )
HAEMORRHAGIC CEREBRAL INFARCTION	4	5.45 ( 2.04 - 14.57 )	5.45 ( 14.45 )	5.42 ( 2.38 )	2.44 ( 1.14 )
Q FEVER	4	19.28 ( 7.16 - 51.91 )	19.28 ( 67.88 )	18.9 ( 8.25 )	4.24 ( 2.93 )
AUTOIMMUNE NEPHRITIS	4	18.88 ( 7.01 - 50.82 )	18.88 ( 66.34 )	18.51 ( 8.08 )	4.21 ( 2.9 )
ACANTHOSIS NIGRICANS	4	21.84 ( 8.1 - 58.87 )	21.84 ( 77.65 )	21.35 ( 9.31 )	4.42 ( 3.11 )
METAPLASIA	4	8.15 ( 3.04 - 21.8 )	8.15 ( 24.85 )	8.08 ( 3.55 )	3.01 ( 1.72 )
URINE PROTEIN/CREATININE RATIO INCREASED	4	5.53 ( 2.07 - 14.79 )	5.53 ( 14.77 )	5.51 ( 2.42 )	2.46 ( 1.17 )
OROTICACIDURIA	4	402.77 ( 124.03 - 1307.94 )	402.75 ( 1109.76 )	279.13 ( 104.18 )	8.12 ( 6.62 )
IRON BINDING CAPACITY TOTAL DECREASED	4	18.12 ( 6.74 - 48.77 )	18.12 ( 63.45 )	17.79 ( 7.77 )	4.15 ( 2.85 )
PERNICIOUS ANAEMIA	4	6.36 ( 2.38 - 17 )	6.36 ( 17.94 )	6.32 ( 2.78 )	2.66 ( 1.36 )
THROMBOPHLEBITIS MIGRANS	4	14.68 ( 5.46 - 39.41 )	14.67 ( 50.16 )	14.46 ( 6.33 )	3.85 ( 2.55 )
BLOOD CHOLINESTERASE DECREASED	4	14.44 ( 5.38 - 38.78 )	14.44 ( 49.26 )	14.23 ( 6.23 )	3.83 ( 2.53 )
PANCREATIC DUCT DILATATION	4	15.36 ( 5.72 - 41.27 )	15.36 ( 52.8 )	15.12 ( 6.61 )	3.92 ( 2.61 )
SYSTEMIC TOXICITY	4	25.17 ( 9.32 - 67.99 )	25.17 ( 90.34 )	24.52 ( 10.68 )	4.62 ( 3.3 )
DUODENAL OBSTRUCTION	4	13.68 ( 5.1 - 36.72 )	13.68 ( 46.31 )	13.49 ( 5.9 )	3.75 ( 2.45 )
ABDOMINAL SEPSIS	4	4.73 ( 1.77 - 12.63 )	4.73 ( 11.69 )	4.71 ( 2.07 )	2.23 ( 0.94 )
BRAIN SCAN ABNORMAL	4	6.73 ( 2.51 - 17.98 )	6.72 ( 19.35 )	6.68 ( 2.93 )	2.74 ( 1.44 )
NON-SMALL CELL LUNG CANCER RECURRENT	4	16.26 ( 6.05 - 43.69 )	16.25 ( 56.25 )	15.99 ( 6.99 )	4 ( 2.69 )
PNEUMONIA NECROTISING	4	7.18 ( 2.68 - 19.2 )	7.18 ( 21.1 )	7.13 ( 3.13 )	2.83 ( 1.54 )
LUNG ADENOCARCINOMA STAGE IV	3	8.94 ( 2.87 - 27.88 )	8.94 ( 20.96 )	8.86 ( 3.42 )	3.15 ( 1.7 )
BILIARY CANCER METASTATIC	3	53.31 ( 16.64 - 170.8 )	53.3 ( 145.42 )	50.4 ( 19.02 )	5.66 ( 4.16 )
FAT EMBOLISM	3	8.14 ( 2.61 - 25.37 )	8.14 ( 18.62 )	8.08 ( 3.12 )	3.01 ( 1.56 )
OESOPHAGOBRONCHIAL FISTULA	3	20.75 ( 6.61 - 65.18 )	20.75 ( 55.14 )	20.31 ( 7.79 )	4.34 ( 2.88 )
METASTASES TO THE MEDIASTINUM	3	7.37 ( 2.37 - 22.95 )	7.37 ( 16.38 )	7.32 ( 2.83 )	2.87 ( 1.42 )
DUCTAL ADENOCARCINOMA OF PANCREAS	3	11.01 ( 3.53 - 34.36 )	11.01 ( 26.96 )	10.89 ( 4.2 )	3.44 ( 1.99 )
BROWN-SEQUARD SYNDROME	3	42.48 ( 13.35 - 135.21 )	42.48 ( 116.06 )	40.62 ( 15.42 )	5.34 ( 3.86 )
SEPSIS SYNDROME	3	5.53 ( 1.78 - 17.19 )	5.53 ( 11.05 )	5.5 ( 2.13 )	2.46 ( 1.01 )
ANAEMIA OF MALIGNANT DISEASE	3	10.83 ( 3.47 - 33.81 )	10.83 ( 26.45 )	10.71 ( 4.13 )	3.42 ( 1.97 )
PSEUDOSEPSIS	3	302.07 ( 81.78 - 1115.84 )	302.06 ( 675.14 )	226.79 ( 76 )	7.83 ( 6.18 )
GALLBLADDER CANCER METASTATIC	3	43.15 ( 13.55 - 137.42 )	43.15 ( 117.91 )	41.24 ( 15.64 )	5.37 ( 3.88 )
TRACHEAL HAEMORRHAGE	3	8.55 ( 2.74 - 26.65 )	8.55 ( 19.81 )	8.48 ( 3.27 )	3.08 ( 1.63 )
VITAMIN K DEFICIENCY	3	8.34 ( 2.68 - 25.99 )	8.34 ( 19.2 )	8.27 ( 3.2 )	3.05 ( 1.6 )
ACUTE MYELOMONOCYTIC LEUKAEMIA	3	12.59 ( 4.03 - 39.33 )	12.59 ( 31.56 )	12.43 ( 4.79 )	3.64 ( 2.18 )
DILATATION INTRAHEPATIC DUCT ACQUIRED	3	10.34 ( 3.31 - 32.26 )	10.34 ( 25.01 )	10.23 ( 3.95 )	3.35 ( 1.9 )
THORACIC HAEMORRHAGE	3	15.27 ( 4.88 - 47.81 )	15.27 ( 39.35 )	15.04 ( 5.79 )	3.91 ( 2.45 )
HEPATOJUGULAR REFLUX	3	16.89 ( 5.39 - 52.91 )	16.89 ( 44.01 )	16.59 ( 6.38 )	4.05 ( 2.59 )
PNEUMONIA MORAXELLA	3	41.83 ( 13.15 - 133.08 )	41.82 ( 114.27 )	40.02 ( 15.19 )	5.32 ( 3.84 )
ORNITHINE TRANSCARBAMOYLASE DEFICIENCY	3	90.62 ( 27.66 - 296.95 )	90.62 ( 241.71 )	82.47 ( 30.55 )	6.37 ( 4.84 )
TUMOUR RUPTURE	3	5.85 ( 1.88 - 18.19 )	5.85 ( 11.97 )	5.82 ( 2.25 )	2.54 ( 1.09 )
BREAST OEDEMA	3	16.09 ( 5.14 - 50.38 )	16.09 ( 41.7 )	15.82 ( 6.09 )	3.98 ( 2.52 )
PARANEOPLASTIC RASH	3	113.28 ( 34.11 - 376.2 )	113.27 ( 296.75 )	100.8 ( 36.92 )	6.66 ( 5.11 )
NAIL PIGMENTATION	3	12.19 ( 3.9 - 38.09 )	12.19 ( 30.41 )	12.04 ( 4.64 )	3.59 ( 2.13 )
HODGKIN'S DISEASE RECURRENT	3	10.66 ( 3.42 - 33.28 )	10.66 ( 25.96 )	10.55 ( 4.07 )	3.4 ( 1.95 )
RECTAL STENOSIS	3	9.61 ( 3.08 - 29.97 )	9.61 ( 22.89 )	9.52 ( 3.67 )	3.25 ( 1.8 )
RENAL SALT-WASTING SYNDROME	3	7.72 ( 2.48 - 24.06 )	7.72 ( 17.41 )	7.67 ( 2.96 )	2.94 ( 1.49 )
METASTASES TO GASTROINTESTINAL TRACT	3	12.64 ( 4.05 - 39.52 )	12.64 ( 31.73 )	12.48 ( 4.81 )	3.64 ( 2.19 )
PNEUMONITIS CHEMICAL	3	9.03 ( 2.9 - 28.16 )	9.03 ( 21.22 )	8.95 ( 3.46 )	3.16 ( 1.71 )
TRANSITIONAL CELL CARCINOMA RECURRENT	3	108.75 ( 32.83 - 360.19 )	108.74 ( 285.94 )	97.2 ( 35.68 )	6.6 ( 5.06 )
CATHETER SITE EXTRAVASATION	3	7.49 ( 2.4 - 23.33 )	7.49 ( 16.73 )	7.44 ( 2.87 )	2.89 ( 1.44 )
GASTRODUODENAL ULCER	3	7.19 ( 2.31 - 22.4 )	7.19 ( 15.87 )	7.14 ( 2.76 )	2.84 ( 1.39 )
DERMO-HYPODERMITIS	3	5.58 ( 1.79 - 17.37 )	5.58 ( 11.22 )	5.55 ( 2.15 )	2.47 ( 1.02 )
GLOMERULONEPHROPATHY	3	11.01 ( 3.53 - 34.36 )	11.01 ( 26.96 )	10.89 ( 4.2 )	3.44 ( 1.99 )
METASTASES TO RETROPERITONEUM	3	19.84 ( 6.32 - 62.29 )	19.84 ( 52.53 )	19.44 ( 7.46 )	4.28 ( 2.82 )
ANALGESIC THERAPY	3	14.16 ( 4.53 - 44.29 )	14.16 ( 36.12 )	13.96 ( 5.37 )	3.8 ( 2.35 )
METASTASES TO ABDOMINAL CAVITY	3	6.26 ( 2.01 - 19.5 )	6.26 ( 13.18 )	6.23 ( 2.41 )	2.64 ( 1.19 )
HODGKIN'S DISEASE REFRACTORY	3	30.89 ( 9.77 - 97.64 )	30.89 ( 83.91 )	29.91 ( 11.42 )	4.9 ( 3.43 )
PERIPHERAL T-CELL LYMPHOMA UNSPECIFIED	3	5.53 ( 1.78 - 17.19 )	5.53 ( 11.05 )	5.5 ( 2.13 )	2.46 ( 1.01 )
VITAMIN B1 DEFICIENCY	3	7.55 ( 2.42 - 23.53 )	7.55 ( 16.91 )	7.5 ( 2.9 )	2.91 ( 1.46 )
MYELOID LEUKAEMIA	3	5.94 ( 1.91 - 18.47 )	5.94 ( 12.23 )	5.9 ( 2.28 )	2.56 ( 1.11 )
ACQUIRED DIAPHRAGMATIC EVENTRATION	3	8.5 ( 2.73 - 26.48 )	8.5 ( 19.66 )	8.43 ( 3.25 )	3.07 ( 1.62 )
ADMINISTRATION SITE CELLULITIS	3	118.2 ( 35.49 - 393.69 )	118.2 ( 308.39 )	104.67 ( 38.25 )	6.71 ( 5.16 )
HYPERSPLENISM	3	6.05 ( 1.95 - 18.85 )	6.05 ( 12.58 )	6.02 ( 2.33 )	2.59 ( 1.14 )
WOUND INFECTION PSEUDOMONAS	3	10.14 ( 3.25 - 31.65 )	10.14 ( 24.45 )	10.04 ( 3.88 )	3.33 ( 1.87 )
CELL-MEDIATED IMMUNE DEFICIENCY	3	23.85 ( 7.58 - 75.05 )	23.85 ( 63.98 )	23.26 ( 8.91 )	4.54 ( 3.07 )
IMMUNOGLOBULIN G4 RELATED DISEASE	3	11.62 ( 3.72 - 36.29 )	11.62 ( 28.74 )	11.48 ( 4.43 )	3.52 ( 2.07 )
SOFT TISSUE SWELLING	3	5.46 ( 1.75 - 16.98 )	5.46 ( 10.86 )	5.43 ( 2.1 )	2.44 ( 0.99 )
CEREBELLAR STROKE	3	9.47 ( 3.04 - 29.55 )	9.47 ( 22.5 )	9.38 ( 3.62 )	3.23 ( 1.78 )
INFUSION RELATED HYPERSENSITIVITY REACTION	3	6.71 ( 2.16 - 20.9 )	6.71 ( 14.48 )	6.67 ( 2.58 )	2.74 ( 1.29 )
TP53 GENE MUTATION	3	46.08 ( 14.44 - 147 )	46.08 ( 125.89 )	43.9 ( 16.63 )	5.46 ( 3.97 )
SKIN TURGOR DECREASED	3	7.39 ( 2.37 - 23.01 )	7.39 ( 16.43 )	7.34 ( 2.83 )	2.87 ( 1.42 )
IIIRD NERVE PARESIS	3	15.9 ( 5.08 - 49.79 )	15.9 ( 41.16 )	15.64 ( 6.02 )	3.97 ( 2.51 )
ENTEROBACTER BACTERAEMIA	3	10.62 ( 3.4 - 33.15 )	10.62 ( 25.84 )	10.51 ( 4.05 )	3.39 ( 1.94 )
VAGINAL CELLULITIS	3	90.62 ( 27.66 - 296.95 )	90.62 ( 241.71 )	82.47 ( 30.55 )	6.37 ( 4.84 )
PREALBUMIN DECREASED	3	25.65 ( 8.14 - 80.8 )	25.65 ( 69.1 )	24.97 ( 9.56 )	4.64 ( 3.17 )
HYDROURETER	3	8.71 ( 2.79 - 27.17 )	8.71 ( 20.29 )	8.64 ( 3.34 )	3.11 ( 1.66 )
CARDIAC VALVE VEGETATION	3	6.12 ( 1.97 - 19.06 )	6.12 ( 12.77 )	6.09 ( 2.35 )	2.61 ( 1.16 )
RADIATION MYELOPATHY	3	67.97 ( 21.03 - 219.71 )	67.96 ( 184.12 )	63.29 ( 23.71 )	5.98 ( 4.48 )
COAGULATION FACTOR V LEVEL DECREASED	3	8.8 ( 2.82 - 27.43 )	8.8 ( 20.54 )	8.72 ( 3.37 )	3.12 ( 1.67 )
PANCREATIC DUCT OBSTRUCTION	3	19.28 ( 6.14 - 60.51 )	19.28 ( 50.91 )	18.9 ( 7.26 )	4.24 ( 2.78 )
BLOOD BICARBONATE INCREASED	3	5.98 ( 1.92 - 18.6 )	5.97 ( 12.35 )	5.94 ( 2.3 )	2.57 ( 1.12 )
SPLENIC VEIN THROMBOSIS	3	5.77 ( 1.85 - 17.96 )	5.77 ( 11.76 )	5.74 ( 2.22 )	2.52 ( 1.07 )
BLOOD ALKALINE PHOSPHATASE	3	16.28 ( 5.2 - 50.99 )	16.28 ( 42.26 )	16.01 ( 6.16 )	4 ( 2.54 )
HEPATIC ARTERY THROMBOSIS	3	10.42 ( 3.34 - 32.51 )	10.42 ( 25.25 )	10.31 ( 3.98 )	3.37 ( 1.91 )
PORTAL VEIN STENOSIS	3	57.84 ( 18 - 185.85 )	57.84 ( 157.52 )	54.43 ( 20.5 )	5.77 ( 4.27 )

## Sheet: Gemcitabine + Cisplatin
PT	a	ROR(95%Cl)	PRR(Chi-square)	EBGM(EBGM05)	IC(IC025)
THROMBOCYTOPENIA	326	18.12 ( 16.22 - 20.23 )	17.56 ( 5084.49 )	17.51 ( 15.96 )	4.13 ( 3.97 )
DISEASE PROGRESSION	260	13.63 ( 12.05 - 15.42 )	13.31 ( 2957.82 )	13.28 ( 11.98 )	3.73 ( 3.55 )
NEUTROPENIA	207	9.29 ( 8.09 - 10.66 )	9.11 ( 1496.34 )	9.1 ( 8.11 )	3.19 ( 2.98 )
ANAEMIA	179	5.6 ( 4.83 - 6.49 )	5.51 ( 663.1 )	5.51 ( 4.87 )	2.46 ( 2.25 )
MALIGNANT NEOPLASM PROGRESSION	164	10.12 ( 8.67 - 11.81 )	9.97 ( 1324.02 )	9.96 ( 8.75 )	3.32 ( 3.09 )
PULMONARY EMBOLISM	129	7.98 ( 6.71 - 9.5 )	7.89 ( 776.9 )	7.88 ( 6.82 )	2.98 ( 2.72 )
FEBRILE NEUTROPENIA	116	10.71 ( 8.92 - 12.87 )	10.6 ( 1007.76 )	10.58 ( 9.08 )	3.4 ( 3.13 )
DEEP VEIN THROMBOSIS	107	9.55 ( 7.89 - 11.56 )	9.46 ( 808.95 )	9.44 ( 8.05 )	3.24 ( 2.96 )
PANCYTOPENIA	97	10.62 ( 8.7 - 12.98 )	10.53 ( 835.78 )	10.51 ( 8.89 )	3.39 ( 3.1 )
GENERAL PHYSICAL HEALTH DETERIORATION	94	5.16 ( 4.21 - 6.32 )	5.12 ( 311.73 )	5.11 ( 4.31 )	2.35 ( 2.06 )
LEUKOPENIA	89	10.72 ( 8.7 - 13.21 )	10.63 ( 775.98 )	10.62 ( 8.91 )	3.41 ( 3.1 )
TOXICITY TO VARIOUS AGENTS	80	2.94 ( 2.36 - 3.66 )	2.92 ( 101.4 )	2.92 ( 2.43 )	1.55 ( 1.22 )
MYELOSUPPRESSION	78	19.86 ( 15.88 - 24.82 )	19.71 ( 1380.76 )	19.64 ( 16.3 )	4.3 ( 3.97 )
PLATELET COUNT DECREASED	75	4.19 ( 3.34 - 5.26 )	4.17 ( 180.88 )	4.17 ( 3.45 )	2.06 ( 1.73 )
NEOPLASM PROGRESSION	74	12.02 ( 9.56 - 15.12 )	11.94 ( 740.67 )	11.92 ( 9.84 )	3.57 ( 3.24 )
SEPSIS	72	3.85 ( 3.05 - 4.86 )	3.83 ( 150.72 )	3.83 ( 3.15 )	1.94 ( 1.6 )
DEHYDRATION	71	3.16 ( 2.5 - 3.99 )	3.15 ( 104.21 )	3.15 ( 2.59 )	1.65 ( 1.31 )
ACUTE KIDNEY INJURY	68	2.73 ( 2.15 - 3.47 )	2.72 ( 74.3 )	2.72 ( 2.23 )	1.44 ( 1.1 )
NEUROPATHY PERIPHERAL	56	3.68 ( 2.83 - 4.79 )	3.66 ( 108.6 )	3.66 ( 2.94 )	1.87 ( 1.49 )
SEPTIC SHOCK	51	7.23 ( 5.49 - 9.52 )	7.2 ( 271.9 )	7.19 ( 5.71 )	2.85 ( 2.44 )
TREATMENT FAILURE	51	3.87 ( 2.94 - 5.1 )	3.86 ( 107.96 )	3.85 ( 3.06 )	1.95 ( 1.55 )
BONE MARROW FAILURE	45	12.6 ( 9.4 - 16.9 )	12.55 ( 477.45 )	12.52 ( 9.8 )	3.65 ( 3.22 )
THROMBOTIC MICROANGIOPATHY	44	28.73 ( 21.35 - 38.66 )	28.6 ( 1166.11 )	28.46 ( 22.2 )	4.83 ( 4.4 )
INTERSTITIAL LUNG DISEASE	43	5.44 ( 4.03 - 7.33 )	5.42 ( 154.8 )	5.41 ( 4.21 )	2.44 ( 2 )
RENAL IMPAIRMENT	42	3.04 ( 2.25 - 4.12 )	3.04 ( 57.41 )	3.04 ( 2.36 )	1.6 ( 1.16 )
NEUTROPENIC SEPSIS	42	34.32 ( 25.33 - 46.52 )	34.18 ( 1344.62 )	33.98 ( 26.34 )	5.09 ( 4.64 )
PLEURAL EFFUSION	41	3.96 ( 2.92 - 5.39 )	3.95 ( 90.44 )	3.95 ( 3.06 )	1.98 ( 1.54 )
DRUG RESISTANCE	40	9.46 ( 6.94 - 12.91 )	9.43 ( 301.02 )	9.41 ( 7.26 )	3.23 ( 2.78 )
NEUTROPHIL COUNT DECREASED	37	5.54 ( 4.01 - 7.65 )	5.52 ( 136.85 )	5.51 ( 4.21 )	2.46 ( 1.99 )
RESPIRATORY FAILURE	37	3 ( 2.17 - 4.15 )	3 ( 49.2 )	2.99 ( 2.29 )	1.58 ( 1.11 )
DISEASE RECURRENCE	37	4.59 ( 3.32 - 6.33 )	4.57 ( 103.27 )	4.57 ( 3.49 )	2.19 ( 1.72 )
NEPHROPATHY TOXIC	36	20.35 ( 14.66 - 28.25 )	20.28 ( 657.63 )	20.21 ( 15.36 )	4.34 ( 3.86 )
HAEMATOTOXICITY	35	24.8 ( 17.78 - 34.58 )	24.72 ( 792.92 )	24.61 ( 18.63 )	4.62 ( 4.14 )
TINNITUS	33	4.29 ( 3.05 - 6.03 )	4.28 ( 82.81 )	4.27 ( 3.21 )	2.1 ( 1.6 )
HYPOKALAEMIA	32	4.18 ( 2.96 - 5.92 )	4.17 ( 77.21 )	4.17 ( 3.12 )	2.06 ( 1.56 )
PERIPHERAL ISCHAEMIA	30	43.71 ( 30.5 - 62.64 )	43.58 ( 1238.19 )	43.24 ( 32 )	5.43 ( 4.91 )
HYPONATRAEMIA	28	2.95 ( 2.04 - 4.28 )	2.95 ( 35.99 )	2.94 ( 2.16 )	1.56 ( 1.02 )
PNEUMONITIS	27	6.21 ( 4.25 - 9.06 )	6.19 ( 117.47 )	6.19 ( 4.51 )	2.63 ( 2.08 )
POSTERIOR REVERSIBLE ENCEPHALOPATHY SYNDROME	26	17.07 ( 11.61 - 25.09 )	17.02 ( 390.97 )	16.97 ( 12.29 )	4.09 ( 3.53 )
METASTASES TO LIVER	26	9.06 ( 6.16 - 13.32 )	9.04 ( 185.67 )	9.03 ( 6.54 )	3.17 ( 2.62 )
HAEMOPTYSIS	26	5.49 ( 3.73 - 8.06 )	5.47 ( 95.03 )	5.47 ( 3.96 )	2.45 ( 1.9 )
AORTIC THROMBOSIS	25	138.17 ( 92.85 - 205.6 )	137.83 ( 3311.17 )	134.41 ( 96.38 )	7.07 ( 6.5 )
ASCITES	24	4.83 ( 3.24 - 7.21 )	4.82 ( 72.68 )	4.82 ( 3.45 )	2.27 ( 1.69 )
CHOLANGITIS	23	23.99 ( 15.92 - 36.15 )	23.94 ( 503.35 )	23.84 ( 16.91 )	4.58 ( 3.98 )
METASTASES TO LUNG	22	11.77 ( 7.74 - 17.88 )	11.74 ( 215.76 )	11.72 ( 8.25 )	3.55 ( 2.95 )
ACUTE MYELOID LEUKAEMIA	22	8.56 ( 5.63 - 13.01 )	8.54 ( 146.28 )	8.53 ( 6.01 )	3.09 ( 2.49 )
GASTROINTESTINAL TOXICITY	21	29.26 ( 19.05 - 44.95 )	29.2 ( 568.84 )	29.05 ( 20.28 )	4.86 ( 4.24 )
THROMBOCYTOSIS	21	35.75 ( 23.27 - 54.94 )	35.68 ( 703.24 )	35.45 ( 24.75 )	5.15 ( 4.53 )
ISCHAEMIC STROKE	21	6.96 ( 4.54 - 10.69 )	6.95 ( 106.91 )	6.94 ( 4.85 )	2.8 ( 2.18 )
MUCOSAL INFLAMMATION	20	4.64 ( 2.99 - 7.19 )	4.63 ( 56.9 )	4.63 ( 3.2 )	2.21 ( 1.58 )
METASTASES TO CENTRAL NERVOUS SYSTEM	19	9.29 ( 5.92 - 14.58 )	9.27 ( 140.04 )	9.26 ( 6.35 )	3.21 ( 2.56 )
RECALL PHENOMENON	18	130.59 ( 81.79 - 208.51 )	130.36 ( 2255.95 )	127.3 ( 86.05 )	6.99 ( 6.32 )
HEPATIC FAILURE	17	3.33 ( 2.07 - 5.36 )	3.32 ( 27.63 )	3.32 ( 2.23 )	1.73 ( 1.05 )
EMBOLISM	16	11.18 ( 6.84 - 18.26 )	11.16 ( 147.74 )	11.14 ( 7.39 )	3.48 ( 2.78 )
NEUROTOXICITY	16	5.79 ( 3.55 - 9.46 )	5.79 ( 63.29 )	5.78 ( 3.83 )	2.53 ( 1.83 )
HYPOMAGNESAEMIA	16	7.05 ( 4.32 - 11.51 )	7.04 ( 82.82 )	7.03 ( 4.66 )	2.81 ( 2.11 )
TRANSITIONAL CELL CARCINOMA	16	80.59 ( 49.17 - 132.08 )	80.46 ( 1237.11 )	79.29 ( 52.44 )	6.31 ( 5.6 )
ACUTE RESPIRATORY DISTRESS SYNDROME	16	5.38 ( 3.29 - 8.79 )	5.37 ( 56.93 )	5.37 ( 3.56 )	2.42 ( 1.72 )
ATYPICAL HAEMOLYTIC URAEMIC SYNDROME	16	129.86 ( 79.06 - 213.31 )	129.66 ( 1994.64 )	126.63 ( 83.6 )	6.98 ( 6.28 )
ELECTROLYTE IMBALANCE	15	8.05 ( 4.85 - 13.37 )	8.04 ( 92.39 )	8.03 ( 5.26 )	3.01 ( 2.28 )
MYOSITIS	15	10.53 ( 6.35 - 17.49 )	10.52 ( 129 )	10.5 ( 6.87 )	3.39 ( 2.67 )
ACUTE CORONARY SYNDROME	15	10.34 ( 6.23 - 17.17 )	10.33 ( 126.19 )	10.31 ( 6.75 )	3.37 ( 2.64 )
TUMOUR LYSIS SYNDROME	15	10.69 ( 6.44 - 17.76 )	10.68 ( 131.37 )	10.66 ( 6.98 )	3.41 ( 2.69 )
MULTIPLE ORGAN DYSFUNCTION SYNDROME	15	3.51 ( 2.11 - 5.82 )	3.5 ( 26.84 )	3.5 ( 2.29 )	1.81 ( 1.09 )
BLOOD BILIRUBIN INCREASED	15	3.23 ( 1.95 - 5.36 )	3.23 ( 23.07 )	3.23 ( 2.11 )	1.69 ( 0.97 )
AGRANULOCYTOSIS	15	5.02 ( 3.03 - 8.33 )	5.02 ( 48.19 )	5.01 ( 3.28 )	2.33 ( 1.6 )
JAUNDICE	15	3.24 ( 1.95 - 5.37 )	3.23 ( 23.12 )	3.23 ( 2.11 )	1.69 ( 0.97 )
THERAPY PARTIAL RESPONDER	15	7.69 ( 4.63 - 12.76 )	7.68 ( 87.01 )	7.67 ( 5.02 )	2.94 ( 2.22 )
ORGANISING PNEUMONIA	15	19.1 ( 11.5 - 31.73 )	19.08 ( 256.05 )	19.01 ( 12.44 )	4.25 ( 3.53 )
LEUKOCYTOSIS	14	4.65 ( 2.75 - 7.86 )	4.64 ( 40.01 )	4.64 ( 2.99 )	2.21 ( 1.47 )
UROSEPSIS	14	9.08 ( 5.38 - 15.35 )	9.07 ( 100.39 )	9.06 ( 5.84 )	3.18 ( 2.43 )
PERFORMANCE STATUS DECREASED	14	17.45 ( 10.32 - 29.5 )	17.43 ( 216.14 )	17.38 ( 11.2 )	4.12 ( 3.37 )
HAEMOLYTIC ANAEMIA	14	9.26 ( 5.48 - 15.65 )	9.25 ( 102.85 )	9.24 ( 5.95 )	3.21 ( 2.46 )
METASTASES TO BONE	14	5.34 ( 3.16 - 9.03 )	5.34 ( 49.3 )	5.33 ( 3.44 )	2.41 ( 1.67 )
BLOOD MAGNESIUM DECREASED	14	9.78 ( 5.79 - 16.52 )	9.76 ( 109.95 )	9.75 ( 6.28 )	3.29 ( 2.54 )
EMBOLISM VENOUS	14	28.28 ( 16.72 - 47.84 )	28.25 ( 366.04 )	28.1 ( 18.1 )	4.81 ( 4.07 )
PULMONARY TOXICITY	14	12.61 ( 7.46 - 21.3 )	12.59 ( 149.02 )	12.56 ( 8.1 )	3.65 ( 2.9 )
RADIATION PNEUMONITIS	13	36.46 ( 21.12 - 62.93 )	36.41 ( 444.75 )	36.18 ( 22.91 )	5.18 ( 4.4 )
PNEUMOTHORAX	13	4.92 ( 2.85 - 8.47 )	4.91 ( 40.48 )	4.91 ( 3.11 )	2.3 ( 1.52 )
CYANOSIS	13	4.85 ( 2.81 - 8.35 )	4.84 ( 39.62 )	4.84 ( 3.07 )	2.27 ( 1.5 )
SPLENIC INFARCTION	13	44.9 ( 26 - 77.52 )	44.84 ( 552.63 )	44.48 ( 28.16 )	5.48 ( 4.7 )
TRANSAMINASES INCREASED	13	3.48 ( 2.02 - 6 )	3.48 ( 22.92 )	3.47 ( 2.2 )	1.8 ( 1.02 )
DISSEMINATED INTRAVASCULAR COAGULATION	13	5.34 ( 3.1 - 9.21 )	5.34 ( 45.79 )	5.33 ( 3.38 )	2.42 ( 1.64 )
ARTERIOSPASM CORONARY	12	18.88 ( 10.71 - 33.29 )	18.86 ( 202.24 )	18.8 ( 11.69 )	4.23 ( 3.43 )
HYDRONEPHROSIS	12	9.64 ( 5.47 - 16.99 )	9.63 ( 92.69 )	9.62 ( 5.99 )	3.27 ( 2.46 )
CYTOPENIA	12	6.66 ( 3.78 - 11.74 )	6.66 ( 57.63 )	6.65 ( 4.14 )	2.73 ( 1.93 )
CARDIOPULMONARY FAILURE	12	17.72 ( 10.05 - 31.23 )	17.7 ( 188.42 )	17.64 ( 10.98 )	4.14 ( 3.34 )
ACUTE RESPIRATORY FAILURE	12	3.83 ( 2.18 - 6.75 )	3.83 ( 25.08 )	3.83 ( 2.38 )	1.94 ( 1.14 )
PLATELET COUNT INCREASED	12	5.39 ( 3.06 - 9.49 )	5.38 ( 42.76 )	5.38 ( 3.35 )	2.43 ( 1.63 )
PERIPHERAL ARTERY THROMBOSIS	11	45.86 ( 25.33 - 83.05 )	45.81 ( 478.12 )	45.43 ( 27.64 )	5.51 ( 4.67 )
BLADDER DISORDER	11	6.46 ( 3.58 - 11.68 )	6.46 ( 50.68 )	6.45 ( 3.93 )	2.69 ( 1.86 )
METASTATIC NEOPLASM	11	15.51 ( 8.58 - 28.03 )	15.49 ( 148.69 )	15.45 ( 9.41 )	3.95 ( 3.11 )
VASCULITIS	11	5.63 ( 3.11 - 10.17 )	5.62 ( 41.78 )	5.62 ( 3.42 )	2.49 ( 1.66 )
EXTREMITY NECROSIS	11	37.79 ( 20.88 - 68.4 )	37.75 ( 390.79 )	37.49 ( 22.82 )	5.23 ( 4.39 )
BACTERAEMIA	11	5.75 ( 3.18 - 10.39 )	5.75 ( 43.08 )	5.74 ( 3.5 )	2.52 ( 1.69 )
PHLEBITIS	11	12.44 ( 6.88 - 22.48 )	12.43 ( 115.33 )	12.4 ( 7.56 )	3.63 ( 2.8 )
RECURRENT CANCER	10	15.23 ( 8.19 - 28.34 )	15.22 ( 132.47 )	15.18 ( 9.03 )	3.92 ( 3.05 )
OTOTOXICITY	10	32.6 ( 17.5 - 60.73 )	32.57 ( 304.19 )	32.38 ( 19.24 )	5.02 ( 4.14 )
PURPURA	10	6.61 ( 3.56 - 12.3 )	6.61 ( 47.54 )	6.6 ( 3.93 )	2.72 ( 1.85 )
GENERALISED TONIC-CLONIC SEIZURE	10	3.81 ( 2.05 - 7.08 )	3.8 ( 20.67 )	3.8 ( 2.26 )	1.93 ( 1.06 )
CAPILLARY LEAK SYNDROME	10	30.88 ( 16.58 - 57.52 )	30.85 ( 287.22 )	30.68 ( 18.24 )	4.94 ( 4.07 )
CEREBRAL ISCHAEMIA	10	10.98 ( 5.9 - 20.43 )	10.97 ( 90.46 )	10.95 ( 6.52 )	3.45 ( 2.58 )
BLOOD LACTATE DEHYDROGENASE INCREASED	10	3.55 ( 1.91 - 6.59 )	3.54 ( 18.25 )	3.54 ( 2.11 )	1.82 ( 0.95 )
SECOND PRIMARY MALIGNANCY	10	7.1 ( 3.82 - 13.21 )	7.1 ( 52.33 )	7.09 ( 4.22 )	2.83 ( 1.95 )
INTESTINAL PERFORATION	9	4.85 ( 2.52 - 9.33 )	4.85 ( 27.49 )	4.85 ( 2.8 )	2.28 ( 1.36 )
PULMONARY HAEMORRHAGE	9	6.63 ( 3.45 - 12.76 )	6.63 ( 42.97 )	6.62 ( 3.83 )	2.73 ( 1.81 )
DUODENAL ULCER	9	7.6 ( 3.95 - 14.62 )	7.6 ( 51.49 )	7.59 ( 4.39 )	2.92 ( 2.01 )
THROMBOTIC THROMBOCYTOPENIC PURPURA	9	14.96 ( 7.77 - 28.79 )	14.95 ( 116.81 )	14.91 ( 8.62 )	3.9 ( 2.98 )
NECROSIS	9	9.48 ( 4.93 - 18.24 )	9.48 ( 68.13 )	9.46 ( 5.47 )	3.24 ( 2.33 )
NECROSIS ISCHAEMIC	9	116.8 ( 60.33 - 226.13 )	116.69 ( 1010.41 )	114.24 ( 65.72 )	6.84 ( 5.91 )
GENERALISED OEDEMA	9	4.42 ( 2.3 - 8.5 )	4.42 ( 23.77 )	4.41 ( 2.55 )	2.14 ( 1.23 )
MYELODYSPLASTIC SYNDROME	9	3.65 ( 1.9 - 7.03 )	3.65 ( 17.32 )	3.65 ( 2.11 )	1.87 ( 0.95 )
ATELECTASIS	8	4.75 ( 2.38 - 9.51 )	4.75 ( 23.66 )	4.75 ( 2.66 )	2.25 ( 1.28 )
INTESTINAL ISCHAEMIA	8	8.78 ( 4.39 - 17.58 )	8.78 ( 55.05 )	8.77 ( 4.91 )	3.13 ( 2.17 )
SUDDEN DEATH	8	4.29 ( 2.14 - 8.59 )	4.29 ( 20.16 )	4.29 ( 2.4 )	2.1 ( 1.14 )
HISTOPLASMOSIS DISSEMINATED	8	34.38 ( 17.15 - 68.92 )	34.36 ( 257.44 )	34.14 ( 19.08 )	5.09 ( 4.13 )
OESOPHAGITIS	8	4.39 ( 2.19 - 8.78 )	4.38 ( 20.88 )	4.38 ( 2.45 )	2.13 ( 1.17 )
METASTASIS	8	6.71 ( 3.35 - 13.43 )	6.71 ( 38.81 )	6.7 ( 3.75 )	2.74 ( 1.78 )
RENAL TUBULAR NECROSIS	8	4.86 ( 2.43 - 9.73 )	4.86 ( 24.5 )	4.86 ( 2.72 )	2.28 ( 1.32 )
DERMATITIS ACNEIFORM	8	8.09 ( 4.04 - 16.19 )	8.08 ( 49.59 )	8.07 ( 4.52 )	3.01 ( 2.05 )
DIFFUSE LARGE B-CELL LYMPHOMA RECURRENT	8	26.19 ( 13.07 - 52.47 )	26.17 ( 192.72 )	26.05 ( 14.56 )	4.7 ( 3.74 )
VENOUS THROMBOSIS	7	10.53 ( 5.02 - 22.12 )	10.53 ( 60.24 )	10.51 ( 5.65 )	3.39 ( 2.37 )
HYPOPHOSPHATAEMIA	7	5.79 ( 2.76 - 12.15 )	5.79 ( 27.68 )	5.78 ( 3.11 )	2.53 ( 1.51 )
STENOTROPHOMONAS INFECTION	7	33 ( 15.69 - 69.41 )	32.98 ( 215.77 )	32.79 ( 17.6 )	5.04 ( 4.01 )
SYSTOLIC DYSFUNCTION	7	39.97 ( 19 - 84.09 )	39.94 ( 263.82 )	39.66 ( 21.28 )	5.31 ( 4.28 )
NEUTROPHIL COUNT INCREASED	7	3.95 ( 1.88 - 8.3 )	3.95 ( 15.43 )	3.95 ( 2.12 )	1.98 ( 0.96 )
HYPERBILIRUBINAEMIA	7	4.12 ( 1.96 - 8.65 )	4.12 ( 16.52 )	4.12 ( 2.21 )	2.04 ( 1.02 )
FLANK PAIN	7	4.46 ( 2.12 - 9.36 )	4.46 ( 18.76 )	4.45 ( 2.4 )	2.16 ( 1.13 )
MYELITIS	7	28.07 ( 13.35 - 59 )	28.05 ( 181.63 )	27.91 ( 14.99 )	4.8 ( 3.78 )
COLITIS ISCHAEMIC	6	5.45 ( 2.45 - 12.14 )	5.45 ( 21.76 )	5.44 ( 2.78 )	2.44 ( 1.35 )
THROMBOPHLEBITIS	6	9.82 ( 4.41 - 21.87 )	9.81 ( 47.39 )	9.79 ( 5.01 )	3.29 ( 2.2 )
RECTAL TENESMUS	6	31.83 ( 14.26 - 71.03 )	31.81 ( 177.99 )	31.63 ( 16.16 )	4.98 ( 3.89 )
EMPYEMA	6	17.93 ( 8.04 - 39.97 )	17.92 ( 95.52 )	17.86 ( 9.13 )	4.16 ( 3.07 )
EMBOLISM ARTERIAL	6	29.45 ( 13.2 - 65.71 )	29.43 ( 163.89 )	29.28 ( 14.96 )	4.87 ( 3.78 )
NON-SMALL CELL LUNG CANCER	6	7.84 ( 3.52 - 17.46 )	7.83 ( 35.71 )	7.82 ( 4 )	2.97 ( 1.88 )
OVARIAN VEIN THROMBOSIS	6	254.36 ( 112.13 - 577.01 )	254.21 ( 1445.04 )	242.79 ( 122.35 )	7.92 ( 6.8 )
SYSTEMIC INFLAMMATORY RESPONSE SYNDROME	6	9.3 ( 4.17 - 20.72 )	9.3 ( 44.35 )	9.28 ( 4.75 )	3.21 ( 2.12 )
PYELONEPHRITIS	6	4.18 ( 1.88 - 9.31 )	4.18 ( 14.5 )	4.18 ( 2.14 )	2.06 ( 0.97 )
GRAFT VERSUS HOST DISEASE	6	4.86 ( 2.18 - 10.81 )	4.85 ( 18.34 )	4.85 ( 2.48 )	2.28 ( 1.19 )
PULMONARY TUBERCULOSIS	6	8.24 ( 3.7 - 18.37 )	8.24 ( 38.11 )	8.23 ( 4.21 )	3.04 ( 1.95 )
VENTRICULAR HYPOKINESIA	6	10.77 ( 4.83 - 23.99 )	10.76 ( 53.02 )	10.74 ( 5.49 )	3.43 ( 2.33 )
PERIPHERAL SENSORY NEUROPATHY	6	6.33 ( 2.84 - 14.11 )	6.33 ( 26.89 )	6.32 ( 3.24 )	2.66 ( 1.57 )
MICROANGIOPATHIC HAEMOLYTIC ANAEMIA	6	45.5 ( 20.37 - 101.64 )	45.47 ( 258.78 )	45.1 ( 23.02 )	5.5 ( 4.4 )
FISTULA OF SMALL INTESTINE	6	99.4 ( 44.32 - 222.94 )	99.34 ( 573.51 )	97.56 ( 49.63 )	6.61 ( 5.51 )
ENTERITIS	6	5.9 ( 2.65 - 13.15 )	5.9 ( 24.39 )	5.89 ( 3.02 )	2.56 ( 1.47 )
HICCUPS	6	4.5 ( 2.02 - 10.03 )	4.5 ( 16.33 )	4.5 ( 2.3 )	2.17 ( 1.08 )
STRESS CARDIOMYOPATHY	6	6.54 ( 2.93 - 14.56 )	6.53 ( 28.08 )	6.53 ( 3.34 )	2.71 ( 1.61 )
LEFT VENTRICULAR DYSFUNCTION	6	5.45 ( 2.45 - 12.14 )	5.45 ( 21.76 )	5.44 ( 2.78 )	2.44 ( 1.35 )
NON-RENAL CELL CARCINOMA OF KIDNEY	6	1900.26 ( 749.06 - 4820.69 )	1899.13 ( 8413.36 )	1403.97 ( 644.27 )	10.46 ( 9.22 )
METASTASES TO LYMPH NODES	6	5.56 ( 2.5 - 12.39 )	5.56 ( 22.42 )	5.55 ( 2.84 )	2.47 ( 1.38 )
SYSTEMIC INFECTION	6	20.75 ( 9.3 - 46.26 )	20.74 ( 112.27 )	20.66 ( 10.56 )	4.37 ( 3.28 )
AORTIC DISSECTION	5	6.94 ( 2.89 - 16.68 )	6.94 ( 25.37 )	6.93 ( 3.33 )	2.79 ( 1.61 )
RETINAL ISCHAEMIA	5	50.41 ( 20.89 - 121.63 )	50.38 ( 239.77 )	49.92 ( 23.89 )	5.64 ( 4.46 )
LYMPHOCELE	5	42.52 ( 17.63 - 102.54 )	42.5 ( 201.05 )	42.18 ( 20.19 )	5.4 ( 4.21 )
LYMPHANGIOSIS CARCINOMATOSA	5	28.22 ( 11.71 - 67.96 )	28.2 ( 130.5 )	28.06 ( 13.45 )	4.81 ( 3.63 )
RADIATION INJURY	5	28.48 ( 11.83 - 68.61 )	28.47 ( 131.83 )	28.33 ( 13.57 )	4.82 ( 3.64 )
LIVER ABSCESS	5	9.49 ( 3.95 - 22.82 )	9.48 ( 37.88 )	9.47 ( 4.54 )	3.24 ( 2.06 )
NEOPLASM RECURRENCE	5	8.74 ( 3.64 - 21.03 )	8.74 ( 34.22 )	8.73 ( 4.19 )	3.13 ( 1.95 )
FEBRILE BONE MARROW APLASIA	5	7.39 ( 3.07 - 17.77 )	7.39 ( 27.57 )	7.38 ( 3.54 )	2.88 ( 1.7 )
RENAL INFARCT	5	20.44 ( 8.49 - 49.2 )	20.43 ( 92.04 )	20.36 ( 9.76 )	4.35 ( 3.17 )
AUTOIMMUNE HAEMOLYTIC ANAEMIA	5	9.38 ( 3.9 - 22.56 )	9.38 ( 37.36 )	9.36 ( 4.49 )	3.23 ( 2.05 )
GASTRIC PERFORATION	5	11.35 ( 4.72 - 27.31 )	11.35 ( 47.08 )	11.33 ( 5.43 )	3.5 ( 2.32 )
LARGE INTESTINE PERFORATION	5	4.31 ( 1.79 - 10.37 )	4.31 ( 12.71 )	4.31 ( 2.07 )	2.11 ( 0.93 )
ANGINA UNSTABLE	5	4.21 ( 1.75 - 10.11 )	4.21 ( 12.21 )	4.2 ( 2.02 )	2.07 ( 0.89 )
SKIN NECROSIS	5	5.63 ( 2.34 - 13.53 )	5.62 ( 19 )	5.62 ( 2.7 )	2.49 ( 1.31 )
NEUTROPENIC INFECTION	5	29.74 ( 12.35 - 71.65 )	29.73 ( 138.05 )	29.57 ( 14.17 )	4.89 ( 3.7 )
VENTRICULAR ARRHYTHMIA	5	8.11 ( 3.37 - 19.5 )	8.1 ( 31.09 )	8.09 ( 3.88 )	3.02 ( 1.84 )
PRINZMETAL ANGINA	5	29.97 ( 12.44 - 72.21 )	29.96 ( 139.2 )	29.8 ( 14.28 )	4.9 ( 3.72 )
SENSE OF OPPRESSION	5	24.67 ( 10.25 - 59.41 )	24.66 ( 112.99 )	24.55 ( 11.77 )	4.62 ( 3.44 )
PERIPHERAL ARTERY OCCLUSION	5	21.55 ( 8.95 - 51.88 )	21.54 ( 97.55 )	21.46 ( 10.29 )	4.42 ( 3.24 )
BICYTOPENIA	5	17 ( 7.07 - 40.92 )	17 ( 75.04 )	16.95 ( 8.13 )	4.08 ( 2.9 )
VENOUS THROMBOSIS LIMB	5	13.07 ( 5.43 - 31.43 )	13.06 ( 55.55 )	13.03 ( 6.25 )	3.7 ( 2.52 )
ENTEROCOCCAL INFECTION	5	6.25 ( 2.6 - 15.03 )	6.25 ( 22.02 )	6.24 ( 3 )	2.64 ( 1.46 )
CARDIAC VENTRICULAR THROMBOSIS	5	29.58 ( 12.28 - 71.25 )	29.57 ( 137.24 )	29.41 ( 14.09 )	4.88 ( 3.7 )
PERIPHERAL EMBOLISM	5	23.99 ( 9.96 - 57.76 )	23.98 ( 109.62 )	23.88 ( 11.45 )	4.58 ( 3.4 )
GRANULOCYTE-COLONY STIMULATING FACTOR LEVEL INCREASED	5	3845.38 ( 1220.24 - 12118.07 )	3843.48 ( 11204.31 )	2242.44 ( 858.25 )	11.13 ( 9.71 )
IMMUNE THROMBOCYTOPENIA	5	7.89 ( 3.28 - 18.98 )	7.89 ( 30.04 )	7.88 ( 3.78 )	2.98 ( 1.8 )
RENAL COLIC	5	12.73 ( 5.29 - 30.63 )	12.73 ( 53.9 )	12.7 ( 6.09 )	3.67 ( 2.49 )
ARTERIAL THROMBOSIS	5	15.1 ( 6.27 - 36.32 )	15.09 ( 65.6 )	15.05 ( 7.22 )	3.91 ( 2.73 )
GASTROINTESTINAL PERFORATION	4	5.76 ( 2.16 - 15.35 )	5.76 ( 15.71 )	5.75 ( 2.53 )	2.52 ( 1.23 )
METASTASES TO SPINE	4	7.41 ( 2.78 - 19.76 )	7.41 ( 22.14 )	7.4 ( 3.26 )	2.89 ( 1.6 )
RETINOPATHY	4	6.29 ( 2.36 - 16.76 )	6.28 ( 17.75 )	6.28 ( 2.76 )	2.65 ( 1.36 )
DYSAESTHESIA	4	8.1 ( 3.04 - 21.6 )	8.09 ( 24.84 )	8.08 ( 3.56 )	3.02 ( 1.72 )
SUBCLAVIAN VEIN THROMBOSIS	4	20.27 ( 7.59 - 54.13 )	20.27 ( 72.99 )	20.19 ( 8.88 )	4.34 ( 3.04 )
ELECTROCARDIOGRAM ST SEGMENT ELEVATION	4	6.98 ( 2.62 - 18.62 )	6.98 ( 20.47 )	6.97 ( 3.07 )	2.8 ( 1.51 )
JAUNDICE CHOLESTATIC	4	6.67 ( 2.5 - 17.79 )	6.67 ( 19.26 )	6.66 ( 2.93 )	2.74 ( 1.44 )
METASTASES TO MENINGES	4	11.3 ( 4.24 - 30.15 )	11.3 ( 37.47 )	11.28 ( 4.96 )	3.5 ( 2.2 )
REFRACTORY CANCER	4	118.31 ( 43.92 - 318.68 )	118.26 ( 455.08 )	115.74 ( 50.51 )	6.85 ( 5.55 )
METASTASES TO PERITONEUM	4	10.07 ( 3.77 - 26.85 )	10.06 ( 32.59 )	10.05 ( 4.42 )	3.33 ( 2.04 )
TUMOUR HAEMORRHAGE	4	8.54 ( 3.2 - 22.77 )	8.53 ( 26.56 )	8.52 ( 3.75 )	3.09 ( 1.8 )
HEPATIC FIBROSIS	4	7.23 ( 2.71 - 19.27 )	7.22 ( 21.42 )	7.21 ( 3.18 )	2.85 ( 1.56 )
PHOBIA	4	19.52 ( 7.31 - 52.12 )	19.51 ( 70.01 )	19.45 ( 8.55 )	4.28 ( 2.99 )
NON-CARDIAC CHEST PAIN	4	7.03 ( 2.64 - 18.74 )	7.02 ( 20.64 )	7.02 ( 3.09 )	2.81 ( 1.52 )
PERIPHERAL ARTERIAL OCCLUSIVE DISEASE	4	5.79 ( 2.17 - 15.43 )	5.78 ( 15.81 )	5.78 ( 2.54 )	2.53 ( 1.24 )
NORMOCYTIC ANAEMIA	4	18.82 ( 7.05 - 50.24 )	18.81 ( 67.24 )	18.75 ( 8.25 )	4.23 ( 2.94 )
ERYTHROPENIA	4	74.25 ( 27.67 - 199.21 )	74.22 ( 285 )	73.22 ( 32.06 )	6.19 ( 4.89 )
URINARY TRACT INFECTION BACTERIAL	4	9.29 ( 3.48 - 24.77 )	9.29 ( 29.52 )	9.27 ( 4.08 )	3.21 ( 1.92 )
CAROTID ARTERY THROMBOSIS	4	30.5 ( 11.41 - 81.5 )	30.49 ( 113.44 )	30.32 ( 13.32 )	4.92 ( 3.63 )
CHOLANGIOCARCINOMA	4	16.94 ( 6.35 - 45.22 )	16.93 ( 59.79 )	16.88 ( 7.43 )	4.08 ( 2.78 )
GASTROINTESTINAL ULCER	4	10.62 ( 3.98 - 28.32 )	10.61 ( 34.76 )	10.59 ( 4.66 )	3.41 ( 2.11 )
TUMOUR THROMBOSIS	4	121.65 ( 45.15 - 327.78 )	121.6 ( 467.87 )	118.94 ( 51.89 )	6.89 ( 5.59 )
DRUG TOLERANCE DECREASED	4	9.35 ( 3.5 - 24.93 )	9.34 ( 29.74 )	9.33 ( 4.1 )	3.22 ( 1.93 )
EMBOLIC STROKE	4	6.61 ( 2.48 - 17.63 )	6.61 ( 19.02 )	6.6 ( 2.91 )	2.72 ( 1.43 )
HAEMOLYTIC URAEMIC SYNDROME	4	9.69 ( 3.63 - 25.83 )	9.68 ( 31.09 )	9.67 ( 4.25 )	3.27 ( 1.98 )
OROTICACIDURIA	4	2392.45 ( 736.64 - 7770.16 )	2391.5 ( 6617.07 )	1655.96 ( 618 )	10.69 ( 9.19 )
CYSTITIS HAEMORRHAGIC	4	6.01 ( 2.26 - 16.04 )	6.01 ( 16.7 )	6.01 ( 2.64 )	2.59 ( 1.29 )
TONIC CLONIC MOVEMENTS	4	18.4 ( 6.89 - 49.13 )	18.4 ( 65.58 )	18.34 ( 8.06 )	4.2 ( 2.9 )
CARCINOEMBRYONIC ANTIGEN INCREASED	4	12.49 ( 4.68 - 33.32 )	12.48 ( 42.16 )	12.46 ( 5.48 )	3.64 ( 2.35 )
BLOOD CHLORIDE DECREASED	4	8.77 ( 3.29 - 23.4 )	8.77 ( 27.5 )	8.76 ( 3.85 )	3.13 ( 1.84 )
ABDOMINAL RIGIDITY	3	6.74 ( 2.17 - 20.91 )	6.74 ( 14.64 )	6.73 ( 2.61 )	2.75 ( 1.31 )
CYSTITIS INTERSTITIAL	3	10.92 ( 3.52 - 33.9 )	10.91 ( 26.96 )	10.89 ( 4.22 )	3.45 ( 2 )
METASTASES TO THE MEDIASTINUM	3	43.76 ( 14.05 - 136.33 )	43.75 ( 124.3 )	43.4 ( 16.77 )	5.44 ( 3.99 )
PORTAL VEIN THROMBOSIS	3	5.66 ( 1.82 - 17.56 )	5.66 ( 11.49 )	5.65 ( 2.19 )	2.5 ( 1.06 )
ALPHA 1 FOETOPROTEIN INCREASED	3	24.73 ( 7.95 - 76.88 )	24.72 ( 67.97 )	24.61 ( 9.53 )	4.62 ( 3.17 )
OESOPHAGEAL STENOSIS	3	6.35 ( 2.05 - 19.7 )	6.35 ( 13.5 )	6.34 ( 2.46 )	2.66 ( 1.22 )
WHITE BLOOD CELL DISORDER	3	6.58 ( 2.12 - 20.42 )	6.58 ( 14.17 )	6.57 ( 2.55 )	2.72 ( 1.27 )
ARTERITIS	3	28.38 ( 9.12 - 88.27 )	28.37 ( 78.8 )	28.23 ( 10.92 )	4.82 ( 3.37 )
AXILLARY VEIN THROMBOSIS	3	48.93 ( 15.7 - 152.52 )	48.92 ( 139.54 )	48.49 ( 18.73 )	5.6 ( 4.15 )
ENTEROCOLITIS INFECTIOUS	3	18.31 ( 5.89 - 56.88 )	18.3 ( 48.91 )	18.24 ( 7.07 )	4.19 ( 2.74 )
METABOLIC ENCEPHALOPATHY	3	5.94 ( 1.92 - 18.44 )	5.94 ( 12.32 )	5.94 ( 2.3 )	2.57 ( 1.13 )
PSEUDOCELLULITIS	3	126.15 ( 40.15 - 396.41 )	126.11 ( 363.84 )	123.25 ( 47.28 )	6.95 ( 5.48 )
CHEST X-RAY ABNORMAL	3	5.4 ( 1.74 - 16.75 )	5.4 ( 10.74 )	5.39 ( 2.09 )	2.43 ( 0.99 )
RENAL SALT-WASTING SYNDROME	3	45.87 ( 14.72 - 142.95 )	45.86 ( 130.53 )	45.48 ( 17.57 )	5.51 ( 4.06 )
TRANSITIONAL CELL CARCINOMA RECURRENT	3	645.9 ( 194.98 - 2139.61 )	645.7 ( 1724.21 )	576.63 ( 211.67 )	9.17 ( 7.63 )
HODGKIN'S DISEASE REFRACTORY	3	183.49 ( 58.05 - 580.03 )	183.44 ( 526.39 )	177.42 ( 67.73 )	7.47 ( 6 )
VULVAL CANCER	3	29.74 ( 9.56 - 92.51 )	29.73 ( 82.83 )	29.57 ( 11.44 )	4.89 ( 3.44 )
OVARIAN CANCER RECURRENT	3	12.03 ( 3.87 - 37.36 )	12.03 ( 30.27 )	12 ( 4.65 )	3.59 ( 2.14 )
RETINAL ARTERY OCCLUSION	3	7.32 ( 2.36 - 22.72 )	7.32 ( 16.34 )	7.31 ( 2.83 )	2.87 ( 1.43 )
LINEAR IGA DISEASE	3	11.21 ( 3.61 - 34.81 )	11.21 ( 27.84 )	11.19 ( 4.34 )	3.48 ( 2.04 )
ENTEROCOCCAL BACTERAEMIA	3	17.67 ( 5.69 - 54.89 )	17.66 ( 47 )	17.61 ( 6.82 )	4.14 ( 2.69 )
NEUTROPENIC COLITIS	3	9.31 ( 3 - 28.91 )	9.31 ( 22.21 )	9.3 ( 3.6 )	3.22 ( 1.77 )
VISCERAL VENOUS THROMBOSIS	3	375.52 ( 116.48 - 1210.63 )	375.41 ( 1047.18 )	350.99 ( 131.8 )	8.46 ( 6.95 )
CELL-MEDIATED IMMUNE DEFICIENCY	3	141.64 ( 45 - 445.8 )	141.6 ( 408.09 )	138 ( 52.87 )	7.11 ( 5.64 )
SOFT TISSUE SWELLING	3	32.42 ( 10.42 - 100.9 )	32.41 ( 90.79 )	32.23 ( 12.47 )	5.01 ( 3.56 )
HEPATIC ARTERY OCCLUSION	3	218.21 ( 68.78 - 692.24 )	218.14 ( 623.18 )	209.68 ( 79.81 )	7.71 ( 6.23 )
STRABISMUS	3	6 ( 1.93 - 18.63 )	6 ( 12.49 )	6 ( 2.32 )	2.58 ( 1.14 )
RENAL-LIMITED THROMBOTIC MICROANGIOPATHY	3	126.15 ( 40.15 - 396.41 )	126.11 ( 363.84 )	123.25 ( 47.28 )	6.95 ( 5.48 )
IMMUNE-MEDIATED MYOCARDITIS	3	16.51 ( 5.31 - 51.29 )	16.51 ( 43.57 )	16.46 ( 6.38 )	4.04 ( 2.59 )
CUTANEOUS LUPUS ERYTHEMATOSUS	3	8.95 ( 2.88 - 27.78 )	8.95 ( 21.15 )	8.94 ( 3.46 )	3.16 ( 1.71 )
MIXED LIVER INJURY	3	7.32 ( 2.36 - 22.73 )	7.32 ( 16.35 )	7.31 ( 2.83 )	2.87 ( 1.43 )
MUSCLE NECROSIS	3	19.6 ( 6.31 - 60.9 )	19.59 ( 52.73 )	19.52 ( 7.56 )	4.29 ( 2.84 )
BLOOD PRESSURE IMMEASURABLE	3	11.44 ( 3.69 - 35.53 )	11.44 ( 28.52 )	11.42 ( 4.42 )	3.51 ( 2.07 )
DEAFNESS NEUROSENSORY	3	5.65 ( 1.82 - 17.52 )	5.64 ( 11.45 )	5.64 ( 2.19 )	2.5 ( 1.05 )
CANCER PAIN	3	7.18 ( 2.31 - 22.29 )	7.18 ( 15.94 )	7.17 ( 2.78 )	2.84 ( 1.4 )
CARBOHYDRATE ANTIGEN 19-9 INCREASED	3	36.29 ( 11.66 - 112.96 )	36.28 ( 102.22 )	36.04 ( 13.94 )	5.17 ( 3.72 )

## Sheet: Gemcitabine +Pembrolizumab
PT	a	ROR(95%Cl)	PRR(Chi-square)	EBGM(EBGM05)	IC(IC025)
DEATH	31	3.2 ( 2.23 - 4.58 )	3.1 ( 44.78 )	3.1 ( 2.3 )	1.63 ( 1.11 )
MALIGNANT NEOPLASM PROGRESSION	25	22.41 ( 15.03 - 33.4 )	21.65 ( 493.1 )	21.65 ( 15.5 )	4.44 ( 3.86 )
ANAEMIA	23	10.4 ( 6.87 - 15.76 )	10.1 ( 189.09 )	10.1 ( 7.13 )	3.34 ( 2.74 )
RASH	20	4.11 ( 2.63 - 6.41 )	4.02 ( 45.7 )	4.02 ( 2.77 )	2.01 ( 1.37 )
THROMBOCYTOPENIA	19	14.93 ( 9.46 - 23.55 )	14.55 ( 240.2 )	14.55 ( 9.94 )	3.86 ( 3.21 )
NEUTROPENIA	18	11.55 ( 7.24 - 18.45 )	11.29 ( 169.1 )	11.28 ( 7.63 )	3.5 ( 2.83 )
WHITE BLOOD CELL COUNT DECREASED	17	13.52 ( 8.36 - 21.88 )	13.22 ( 192.35 )	13.22 ( 8.84 )	3.72 ( 3.04 )
PYREXIA	17	4.21 ( 2.6 - 6.81 )	4.13 ( 40.59 )	4.13 ( 2.76 )	2.05 ( 1.36 )
ALANINE AMINOTRANSFERASE INCREASED	17	23.64 ( 14.61 - 38.25 )	23.09 ( 359.58 )	23.09 ( 15.43 )	4.53 ( 3.84 )
ASPARTATE AMINOTRANSFERASE INCREASED	17	27.28 ( 16.86 - 44.15 )	26.65 ( 419.95 )	26.64 ( 17.81 )	4.74 ( 4.05 )
DISEASE PROGRESSION	14	10.38 ( 6.12 - 17.62 )	10.19 ( 116.31 )	10.19 ( 6.55 )	3.35 ( 2.6 )
PAIN IN EXTREMITY	12	3.42 ( 1.93 - 6.06 )	3.38 ( 20.22 )	3.38 ( 2.1 )	1.76 ( 0.95 )
STOMATITIS	7	9.96 ( 4.73 - 20.98 )	9.87 ( 55.88 )	9.87 ( 5.3 )	3.3 ( 2.28 )
HYPOALBUMINAEMIA	7	79.72 ( 37.85 - 167.9 )	78.94 ( 538.16 )	78.86 ( 42.28 )	6.3 ( 5.27 )
NEUTROPHIL COUNT DECREASED	6	12.85 ( 5.75 - 28.71 )	12.75 ( 65.01 )	12.75 ( 6.51 )	3.67 ( 2.58 )
SKIN DISCOLOURATION	6	11.16 ( 5 - 24.93 )	11.07 ( 55.02 )	11.07 ( 5.65 )	3.47 ( 2.37 )
OEDEMA PERIPHERAL	6	4.08 ( 1.83 - 9.11 )	4.05 ( 13.82 )	4.05 ( 2.07 )	2.02 ( 0.92 )
BLOOD ALKALINE PHOSPHATASE INCREASED	6	19.85 ( 8.89 - 44.35 )	19.69 ( 106.49 )	19.69 ( 10.05 )	4.3 ( 3.2 )
PNEUMONITIS	6	19.77 ( 8.85 - 44.15 )	19.61 ( 105.97 )	19.6 ( 10.01 )	4.29 ( 3.2 )
METASTASES TO BONE	5	27.35 ( 11.35 - 65.92 )	27.16 ( 125.98 )	27.15 ( 13 )	4.76 ( 3.58 )
HYPOTHYROIDISM	5	13.68 ( 5.68 - 32.97 )	13.59 ( 58.34 )	13.59 ( 6.51 )	3.76 ( 2.58 )
NEOPLASM PROGRESSION	4	9.23 ( 3.46 - 24.67 )	9.19 ( 29.19 )	9.19 ( 4.04 )	3.2 ( 1.9 )
HYPONATRAEMIA	4	6.03 ( 2.26 - 16.1 )	6 ( 16.67 )	6 ( 2.64 )	2.58 ( 1.29 )
HYPERPHOSPHATAEMIA	4	173.71 ( 64.94 - 464.65 )	172.74 ( 681.46 )	172.35 ( 75.66 )	7.43 ( 6.13 )
HYPOKALAEMIA	4	7.47 ( 2.8 - 19.96 )	7.43 ( 22.29 )	7.43 ( 3.27 )	2.89 ( 1.6 )
DEEP VEIN THROMBOSIS	4	5.06 ( 1.89 - 13.51 )	5.03 ( 12.95 )	5.03 ( 2.21 )	2.33 ( 1.04 )
THERAPY PARTIAL RESPONDER	4	29.33 ( 10.97 - 78.37 )	29.17 ( 108.78 )	29.16 ( 12.81 )	4.87 ( 3.57 )
COLITIS	4	9.55 ( 3.57 - 25.51 )	9.5 ( 30.43 )	9.5 ( 4.17 )	3.25 ( 1.95 )
HYPOXIA	3	7.37 ( 2.37 - 22.92 )	7.35 ( 16.45 )	7.35 ( 2.84 )	2.88 ( 1.43 )
UPPER RESPIRATORY TRACT INFECTION	3	5.57 ( 1.79 - 17.33 )	5.56 ( 11.21 )	5.55 ( 2.15 )	2.47 ( 1.03 )
HAEMATOMA	3	9.56 ( 3.08 - 29.72 )	9.53 ( 22.9 )	9.53 ( 3.69 )	3.25 ( 1.8 )
CHOLANGITIS	3	44.54 ( 14.33 - 138.49 )	44.36 ( 127.08 )	44.33 ( 17.16 )	5.47 ( 4.02 )
PERIPHERAL SENSORY NEUROPATHY	3	45.29 ( 14.57 - 140.82 )	45.1 ( 129.32 )	45.08 ( 17.45 )	5.49 ( 4.05 )
DRUG-INDUCED LIVER INJURY	3	9.26 ( 2.98 - 28.77 )	9.22 ( 21.99 )	9.22 ( 3.57 )	3.2 ( 1.76 )
OSTEOMYELITIS	3	13.81 ( 4.44 - 42.92 )	13.75 ( 35.48 )	13.75 ( 5.32 )	3.78 ( 2.33 )
MYELOSUPPRESSION	3	10.81 ( 3.48 - 33.62 )	10.77 ( 26.6 )	10.77 ( 4.17 )	3.43 ( 1.98 )
POSTERIOR REVERSIBLE ENCEPHALOPATHY SYNDROME	3	28.05 ( 9.02 - 87.2 )	27.94 ( 77.9 )	27.93 ( 10.81 )	4.8 ( 3.36 )
SEPTIC SHOCK	3	6.05 ( 1.95 - 18.81 )	6.03 ( 12.59 )	6.03 ( 2.33 )	2.59 ( 1.14 )

## Sheet: Gemcitabine +Nivolumab
PT	a	ROR(95%Cl)	PRR(Chi-square)	EBGM(EBGM05)	IC(IC025)
MALIGNANT NEOPLASM PROGRESSION	25	31.97 ( 21.38 - 47.8 )	30.43 ( 712.59 )	30.42 ( 21.73 )	4.93 ( 4.35 )
GENERAL PHYSICAL HEALTH DETERIORATION	16	17.99 ( 10.93 - 29.6 )	17.45 ( 248.51 )	17.45 ( 11.5 )	4.12 ( 3.41 )
LUNG DISORDER	11	27.78 ( 15.28 - 50.49 )	27.19 ( 277.66 )	27.18 ( 16.49 )	4.76 ( 3.92 )
COUGH	9	3.96 ( 2.05 - 7.65 )	3.9 ( 19.52 )	3.9 ( 2.25 )	1.96 ( 1.04 )
THROMBOCYTOPENIA	9	9.85 ( 5.09 - 19.04 )	9.69 ( 70.24 )	9.69 ( 5.58 )	3.28 ( 2.35 )
PLEURAL EFFUSION	8	15.68 ( 7.8 - 31.54 )	15.45 ( 108.2 )	15.45 ( 8.61 )	3.95 ( 2.98 )
PNEUMOCYSTIS JIROVECII PNEUMONIA	8	100.94 ( 50.18 - 203.04 )	99.35 ( 778.32 )	99.26 ( 55.31 )	6.63 ( 5.66 )
DISEASE PROGRESSION	7	7.25 ( 3.44 - 15.29 )	7.16 ( 37.2 )	7.16 ( 3.84 )	2.84 ( 1.81 )
NEOPLASM PROGRESSION	7	22.9 ( 10.86 - 48.3 )	22.6 ( 144.55 )	22.59 ( 12.1 )	4.5 ( 3.47 )
AFFECTIVE DISORDER	7	109.64 ( 51.98 - 231.26 )	108.12 ( 742.28 )	108.02 ( 57.84 )	6.76 ( 5.73 )
CYSTITIS	7	25.89 ( 12.28 - 54.59 )	25.54 ( 165.13 )	25.54 ( 13.68 )	4.67 ( 3.65 )
DYSPNOEA EXERTIONAL	7	22.94 ( 10.88 - 48.38 )	22.64 ( 144.82 )	22.63 ( 12.12 )	4.5 ( 3.47 )
POLYNEUROPATHY	7	72.95 ( 34.59 - 153.86 )	71.95 ( 489.5 )	71.9 ( 38.51 )	6.17 ( 5.14 )
TREATMENT FAILURE	6	9.19 ( 4.11 - 20.55 )	9.09 ( 43.25 )	9.09 ( 4.63 )	3.18 ( 2.09 )
NEUTROPENIA	6	5.34 ( 2.39 - 11.94 )	5.29 ( 20.9 )	5.29 ( 2.7 )	2.4 ( 1.3 )
HEPATITIS	5	23.71 ( 9.82 - 57.22 )	23.48 ( 107.65 )	23.48 ( 11.23 )	4.55 ( 3.37 )
NEURALGIA	5	25.2 ( 10.44 - 60.82 )	24.96 ( 115.03 )	24.96 ( 11.94 )	4.64 ( 3.46 )
HAEMATURIA	5	17.13 ( 7.1 - 41.34 )	16.97 ( 75.18 )	16.97 ( 8.12 )	4.08 ( 2.9 )
PANCYTOPENIA	5	10.96 ( 4.54 - 26.45 )	10.86 ( 44.8 )	10.86 ( 5.2 )	3.44 ( 2.26 )
NEUROPATHY PERIPHERAL	5	6.61 ( 2.74 - 15.95 )	6.55 ( 23.57 )	6.55 ( 3.14 )	2.71 ( 1.53 )
ORAL CANDIDIASIS	4	38.26 ( 14.3 - 102.37 )	37.97 ( 143.95 )	37.95 ( 16.66 )	5.25 ( 3.95 )
PLEURAL INFECTION	4	2142.37 ( 793.28 - 5785.78 )	2125.34 ( 8329.27 )	2084.29 ( 907.68 )	11.03 ( 9.71 )
RESPIRATORY DISORDER	4	16.1 ( 6.02 - 43.06 )	15.98 ( 56.17 )	15.97 ( 7.01 )	4 ( 2.7 )
MYOSITIS	4	56.6 ( 21.15 - 151.43 )	56.16 ( 216.61 )	56.13 ( 24.63 )	5.81 ( 4.51 )
PELVIC VENOUS THROMBOSIS	4	326.25 ( 121.79 - 873.97 )	323.66 ( 1282.85 )	322.7 ( 141.49 )	8.33 ( 7.03 )
NODULE	4	36.65 ( 13.7 - 98.04 )	36.36 ( 137.54 )	36.35 ( 15.96 )	5.18 ( 3.89 )
SCROTAL SWELLING	4	511.04 ( 190.61 - 1370.13 )	506.98 ( 2010.53 )	504.62 ( 221.1 )	8.98 ( 7.68 )
STATUS EPILEPTICUS	4	43.18 ( 16.14 - 115.51 )	42.84 ( 163.42 )	42.82 ( 18.8 )	5.42 ( 4.12 )
WOUND INFECTION	4	48.64 ( 18.18 - 130.15 )	48.27 ( 185.09 )	48.24 ( 21.17 )	5.59 ( 4.3 )
MICTURITION DISORDER	4	136.97 ( 51.17 - 366.61 )	135.89 ( 534.94 )	135.72 ( 59.55 )	7.08 ( 5.79 )
ACUTE RESPIRATORY FAILURE	4	25.78 ( 9.64 - 68.96 )	25.58 ( 94.48 )	25.57 ( 11.23 )	4.68 ( 3.38 )
RESPIRATORY FAILURE	4	6.53 ( 2.44 - 17.47 )	6.49 ( 18.59 )	6.49 ( 2.85 )	2.7 ( 1.4 )
NEUTROPENIC SEPSIS	3	48.95 ( 15.73 - 152.31 )	48.66 ( 139.99 )	48.64 ( 18.81 )	5.6 ( 4.16 )
ANALGESIC THERAPY	3	1695.43 ( 540.19 - 5321.29 )	1685.33 ( 4972.31 )	1659.42 ( 637.26 )	10.7 ( 9.23 )
MALNUTRITION	3	33.41 ( 10.74 - 103.97 )	33.22 ( 93.73 )	33.21 ( 12.85 )	5.05 ( 3.6 )
BLADDER DISORDER	3	35.48 ( 11.4 - 110.4 )	35.27 ( 99.88 )	35.26 ( 13.64 )	5.14 ( 3.69 )
FEBRILE NEUTROPENIA	3	5.51 ( 1.77 - 17.15 )	5.49 ( 11.01 )	5.48 ( 2.12 )	2.46 ( 1.01 )
PNEUMONITIS	3	13.85 ( 4.45 - 43.11 )	13.78 ( 35.56 )	13.78 ( 5.33 )	3.78 ( 2.34 )
TOXIC SKIN ERUPTION	3	35.7 ( 11.47 - 111.1 )	35.5 ( 100.56 )	35.48 ( 13.73 )	5.15 ( 3.7 )

## Sheet: Gemcitabine +Durvalumab
Supplementary Table 2 The positive signals of each treatment group at the PT level
PT	a	ROR(95%Cl)	PRR(Chi-square)	EBGM(EBGM05)	IC(IC025)
PYREXIA	49	10.86 ( 8.14 - 14.49 )	10.27 ( 412.31 )	10.27 ( 8.06 )	3.36 ( 2.94 )
BILIARY TRACT INFECTION	24	3145.72 ( 2077.11 - 4764.11 )	3053.68 ( 70009.92 )	2919.01 ( 2062.55 )	11.51 ( 10.91 )
COLITIS	20	41.97 ( 26.93 - 65.42 )	40.97 ( 779.88 )	40.95 ( 28.24 )	5.36 ( 4.72 )
SEPSIS	19	12.69 ( 8.05 - 20 )	12.42 ( 199.86 )	12.42 ( 8.49 )	3.63 ( 2.98 )
PNEUMONIA	19	4.45 ( 2.83 - 7.02 )	4.37 ( 49.7 )	4.37 ( 2.99 )	2.13 ( 1.48 )
ABDOMINAL PAIN	19	6.14 ( 3.9 - 9.68 )	6.02 ( 79.87 )	6.02 ( 4.12 )	2.59 ( 1.94 )
IMMUNE-MEDIATED HEPATITIS	15	745.51 ( 446.1 - 1245.88 )	731.89 ( 10828.91 )	723.9 ( 471.05 )	9.5 ( 8.77 )
FEBRILE NEUTROPENIA	14	15.96 ( 9.41 - 27.07 )	15.7 ( 192.92 )	15.7 ( 10.09 )	3.97 ( 3.22 )
NEOPLASM PROGRESSION	14	28.19 ( 16.62 - 47.83 )	27.73 ( 360.78 )	27.72 ( 17.81 )	4.79 ( 4.04 )
DEHYDRATION	13	7.18 ( 4.15 - 12.42 )	7.08 ( 68.06 )	7.08 ( 4.48 )	2.82 ( 2.05 )
PRESYNCOPE	13	40.55 ( 23.44 - 70.14 )	39.92 ( 493.16 )	39.89 ( 25.22 )	5.32 ( 4.54 )
THROMBOCYTOPENIA	13	8.71 ( 5.03 - 15.06 )	8.58 ( 87.26 )	8.58 ( 5.43 )	3.1 ( 2.32 )
EMBOLISM	12	104.4 ( 59.01 - 184.68 )	102.88 ( 1209.02 )	102.73 ( 63.74 )	6.68 ( 5.88 )
PANCYTOPENIA	11	14.84 ( 8.19 - 26.91 )	14.66 ( 140.08 )	14.65 ( 8.91 )	3.87 ( 3.03 )
CEREBROVASCULAR ACCIDENT	11	4.69 ( 2.59 - 8.5 )	4.64 ( 31.48 )	4.64 ( 2.82 )	2.21 ( 1.37 )
PNEUMONITIS	11	31.41 ( 17.32 - 56.95 )	31 ( 319.33 )	30.98 ( 18.83 )	4.95 ( 4.11 )
UPPER GASTROINTESTINAL HAEMORRHAGE	11	47.28 ( 26.08 - 85.74 )	46.66 ( 491.32 )	46.63 ( 28.34 )	5.54 ( 4.7 )
TOXICITY TO VARIOUS AGENTS	9	4.07 ( 2.11 - 7.86 )	4.04 ( 20.65 )	4.04 ( 2.33 )	2.01 ( 1.1 )
MYOCARDITIS	8	57.58 ( 28.69 - 115.56 )	57.02 ( 440.04 )	56.98 ( 31.81 )	5.83 ( 4.86 )
DEEP VEIN THROMBOSIS	8	8.76 ( 4.36 - 17.57 )	8.68 ( 54.43 )	8.68 ( 4.85 )	3.12 ( 2.15 )
SMALL INTESTINAL OBSTRUCTION	7	42.8 ( 20.33 - 90.09 )	42.44 ( 283.14 )	42.42 ( 22.76 )	5.41 ( 4.38 )
HEPATIC INFECTION	7	419.69 ( 198.98 - 885.22 )	416.12 ( 2880.8 )	413.53 ( 221.46 )	8.69 ( 7.66 )
PLEURAL EFFUSION	7	8.35 ( 3.97 - 17.58 )	8.29 ( 44.93 )	8.29 ( 4.45 )	3.05 ( 2.03 )
BILE DUCT STENOSIS	7	438.2 ( 207.74 - 924.34 )	434.47 ( 3007.6 )	431.64 ( 231.14 )	8.75 ( 7.72 )
HEPATITIS	6	17.41 ( 7.8 - 38.86 )	17.29 ( 92.08 )	17.28 ( 8.83 )	4.11 ( 3.02 )
SKIN INFECTION	6	40.65 ( 18.2 - 90.76 )	40.36 ( 230.18 )	40.33 ( 20.59 )	5.33 ( 4.24 )
ENTEROCOLITIS	6	83.46 ( 37.37 - 186.42 )	82.86 ( 484.66 )	82.76 ( 42.25 )	6.37 ( 5.27 )
APPENDICITIS	6	49.08 ( 21.98 - 109.6 )	48.73 ( 280.32 )	48.69 ( 24.86 )	5.61 ( 4.51 )
PANCREATIC CARCINOMA	6	14.58 ( 6.53 - 32.56 )	14.48 ( 75.34 )	14.48 ( 7.4 )	3.86 ( 2.76 )
GASTROINTESTINAL HAEMORRHAGE	6	5.07 ( 2.27 - 11.32 )	5.04 ( 19.46 )	5.04 ( 2.57 )	2.33 ( 1.24 )
URINARY TRACT OBSTRUCTION	6	186.34 ( 83.38 - 416.47 )	184.99 ( 1094.93 )	184.47 ( 94.12 )	7.53 ( 6.43 )
CAUDA EQUINA SYNDROME	6	585.51 ( 261.35 - 1311.7 )	581.23 ( 3445.16 )	576.18 ( 293.39 )	9.17 ( 8.07 )
RASH MACULO-PAPULAR	6	20.34 ( 9.11 - 45.42 )	20.2 ( 109.51 )	20.19 ( 10.31 )	4.34 ( 3.24 )
LIVER FUNCTION TEST INCREASED	6	22.16 ( 9.93 - 49.48 )	22.01 ( 120.31 )	22 ( 11.23 )	4.46 ( 3.36 )
MYELOSUPPRESSION	6	18.71 ( 8.38 - 41.77 )	18.58 ( 99.81 )	18.57 ( 9.48 )	4.22 ( 3.12 )
ENTEROCOLITIS INFECTIOUS	5	378.23 ( 156.62 - 913.42 )	375.93 ( 1859.12 )	373.81 ( 178.75 )	8.55 ( 7.36 )
CEREBRAL ISCHAEMIA	5	67.8 ( 28.13 - 163.4 )	67.39 ( 326.72 )	67.32 ( 32.25 )	6.07 ( 4.89 )
POSTERIOR REVERSIBLE ENCEPHALOPATHY SYNDROME	5	40.39 ( 16.76 - 97.33 )	40.15 ( 190.8 )	40.13 ( 19.22 )	5.33 ( 4.14 )
NEPHRITIS	5	114.45 ( 47.47 - 275.93 )	113.76 ( 557.92 )	113.57 ( 54.38 )	6.83 ( 5.64 )
LOCALISED OEDEMA	5	78.4 ( 32.53 - 188.97 )	77.93 ( 379.3 )	77.84 ( 37.28 )	6.28 ( 5.1 )
RENAL COLIC	5	157.44 ( 65.29 - 379.67 )	156.49 ( 770.68 )	156.12 ( 74.75 )	7.29 ( 6.1 )
CHOLANGITIS INFECTIVE	4	1236.97 ( 458.96 - 3333.82 )	1230.94 ( 4826.01 )	1208.48 ( 527.18 )	10.24 ( 8.93 )
AUTOIMMUNE HEPATITIS	4	44.18 ( 16.54 - 118.04 )	43.97 ( 167.88 )	43.94 ( 19.31 )	5.46 ( 4.16 )
SKIN ULCER	4	11.36 ( 4.25 - 30.33 )	11.31 ( 37.59 )	11.3 ( 4.97 )	3.5 ( 2.2 )
UPPER RESPIRATORY TRACT INFECTION	4	6.41 ( 2.4 - 17.13 )	6.39 ( 18.18 )	6.39 ( 2.81 )	2.67 ( 1.38 )
LARGE INTESTINAL OBSTRUCTION	4	140.04 ( 52.38 - 374.42 )	139.36 ( 548.35 )	139.07 ( 61.08 )	7.12 ( 5.82 )
SMALL INTESTINAL PERFORATION	4	161.37 ( 60.35 - 431.51 )	160.59 ( 632.87 )	160.2 ( 70.35 )	7.32 ( 6.03 )
VIRAL INFECTION	4	9.13 ( 3.42 - 24.38 )	9.09 ( 28.8 )	9.09 ( 3.99 )	3.18 ( 1.89 )
HICCUPS	4	37.07 ( 13.88 - 99.04 )	36.9 ( 139.63 )	36.88 ( 16.2 )	5.2 ( 3.91 )
BLOOD BILIRUBIN INCREASED	4	10.63 ( 3.98 - 28.39 )	10.58 ( 34.71 )	10.58 ( 4.65 )	3.4 ( 2.11 )
RADICULOPATHY	4	109.76 ( 41.06 - 293.38 )	109.23 ( 428.25 )	109.05 ( 47.9 )	6.77 ( 5.47 )
AUTOIMMUNE NEPHRITIS	4	1385.15 ( 513.39 - 3737.21 )	1378.4 ( 5393.26 )	1350.29 ( 588.51 )	10.4 ( 9.09 )
TROPONIN INCREASED	4	41.87 ( 15.67 - 111.86 )	41.67 ( 158.7 )	41.65 ( 18.3 )	5.38 ( 4.09 )
PHOTOSENSITIVITY REACTION	3	13.33 ( 4.29 - 41.41 )	13.28 ( 34.08 )	13.28 ( 5.14 )	3.73 ( 2.28 )
BACILLUS INFECTION	3	353.22 ( 113.34 - 1100.78 )	351.93 ( 1044.26 )	350.07 ( 135.24 )	8.45 ( 7 )
PERICARDIAL EFFUSION	3	9.77 ( 3.15 - 30.37 )	9.74 ( 23.54 )	9.74 ( 3.77 )	3.28 ( 1.84 )
CUTANEOUS LUPUS ERYTHEMATOSUS	3	110.43 ( 35.51 - 343.43 )	110.03 ( 323.58 )	109.85 ( 42.51 )	6.78 ( 5.33 )
